# Supplementary material for: Highly efficient heterogeneous aerobic oxidative C–C coupling from Csp3–H bonds by a magnetic nanoparticle-immobilized bipy–gold(iii) catalyst
Source: Royal Society of Chemistry journal article supplement (doi:10.1039/c6cy02567f), 2017-01-01
Supplement: c6cy02567f1.pdf [file c6cy02567f1.pdf]

## Supporting Information:

### **Highly efficient heterogeneous aerobic oxidative C–C coupling from C<sub>sp3</sub>–H bonds by a magnetic nanoparticles-immobilized bipy-gold(III) catalyst**

Weisen Yang,<sup>a,b</sup> Li Wei,<sup>a</sup> Tao Yan<sup>a</sup> and Mingzhong Cai<sup>a\*</sup>

<sup>a</sup> *Key Laboratory of Functional Small Organic Molecule, Ministry of Education and College of Chemistry & Chemical Engineering, Jiangxi Normal University, Nanchang 330022, P. R. China*

<sup>b</sup> *College of Ecology and Resources Engineering, Wuyi University, Wuyishan City 354300, P. R. China*

E-mail: [mzcai@jxnu.edu.cn](mailto:mzcai@jxnu.edu.cn)

**Copies of <sup>1</sup>H NMR and <sup>13</sup>C NMR spectra of compounds 3a-3b'**

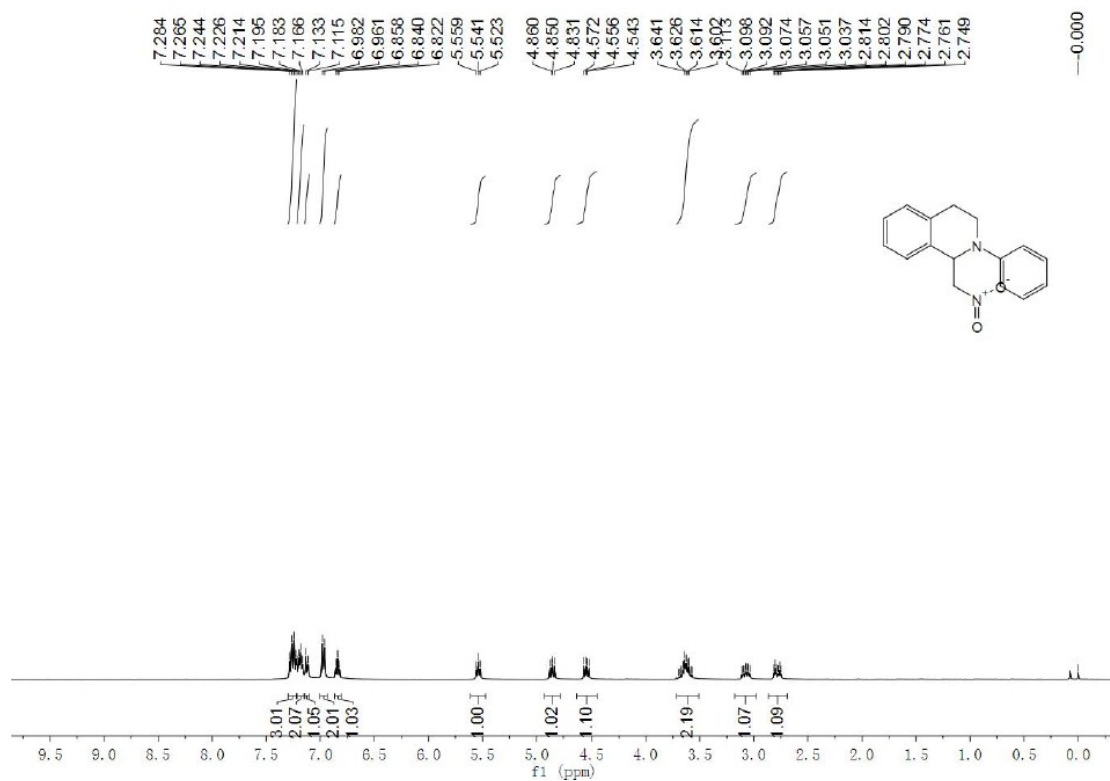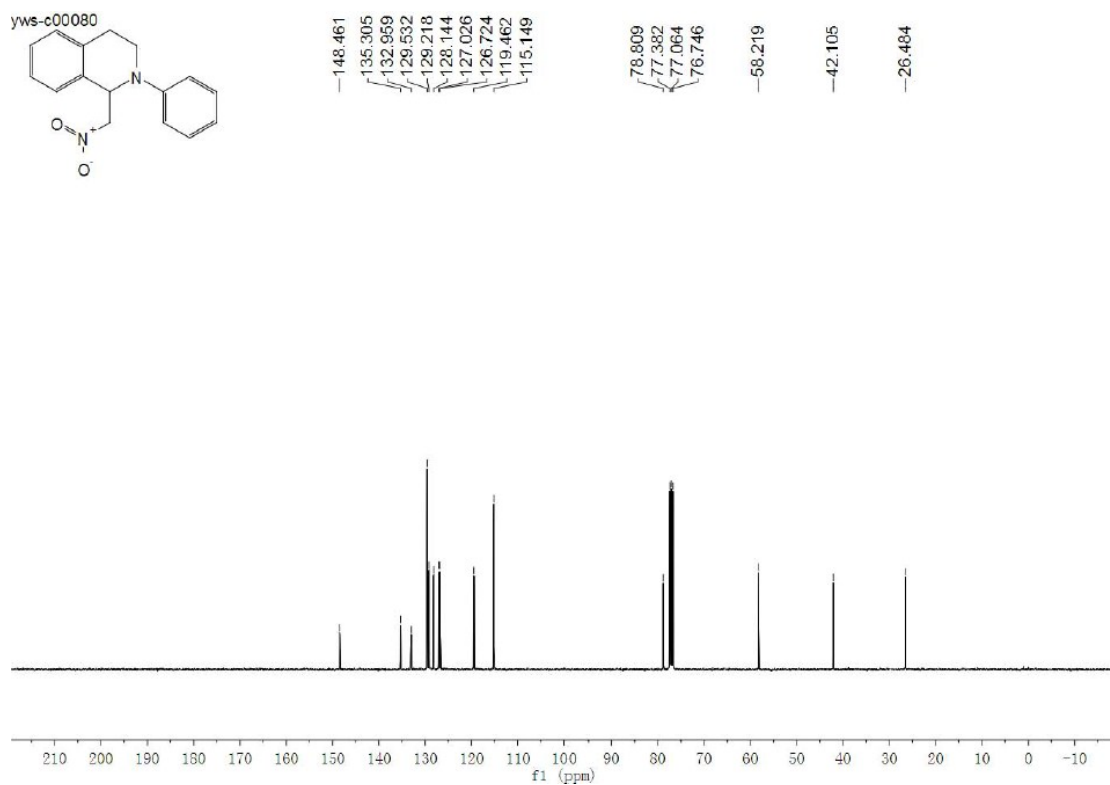

<sup>1</sup>H NMR and <sup>13</sup>C NMR spectra of compound 3a

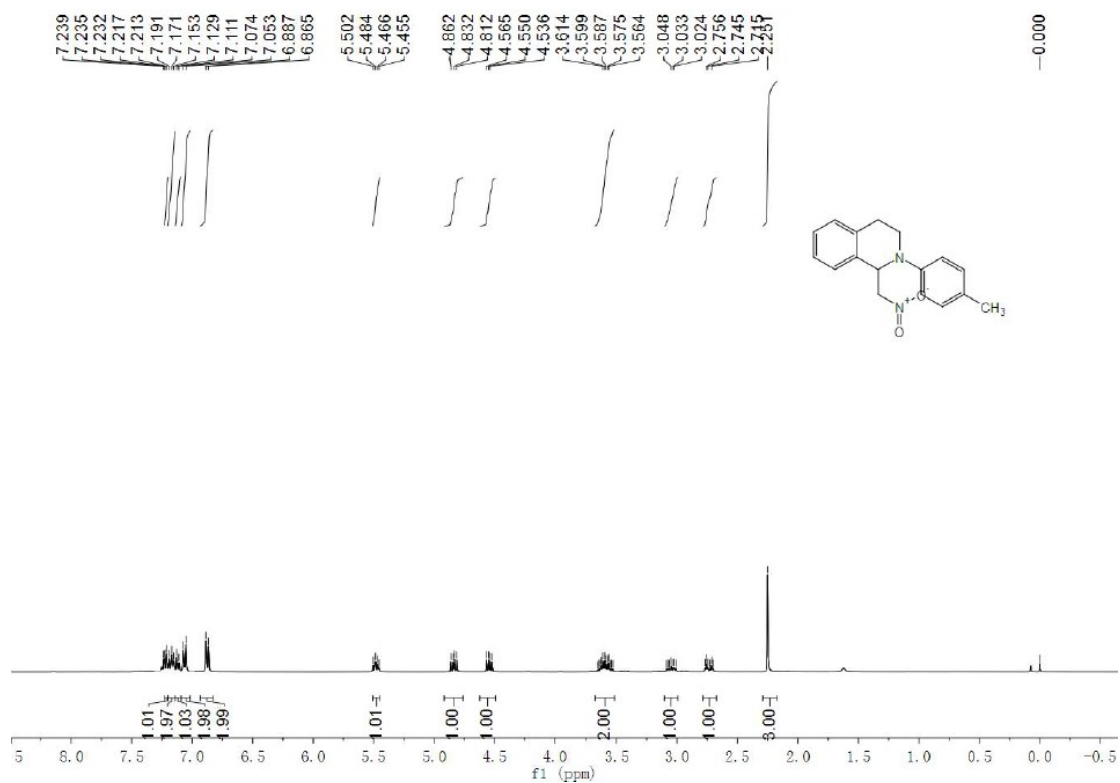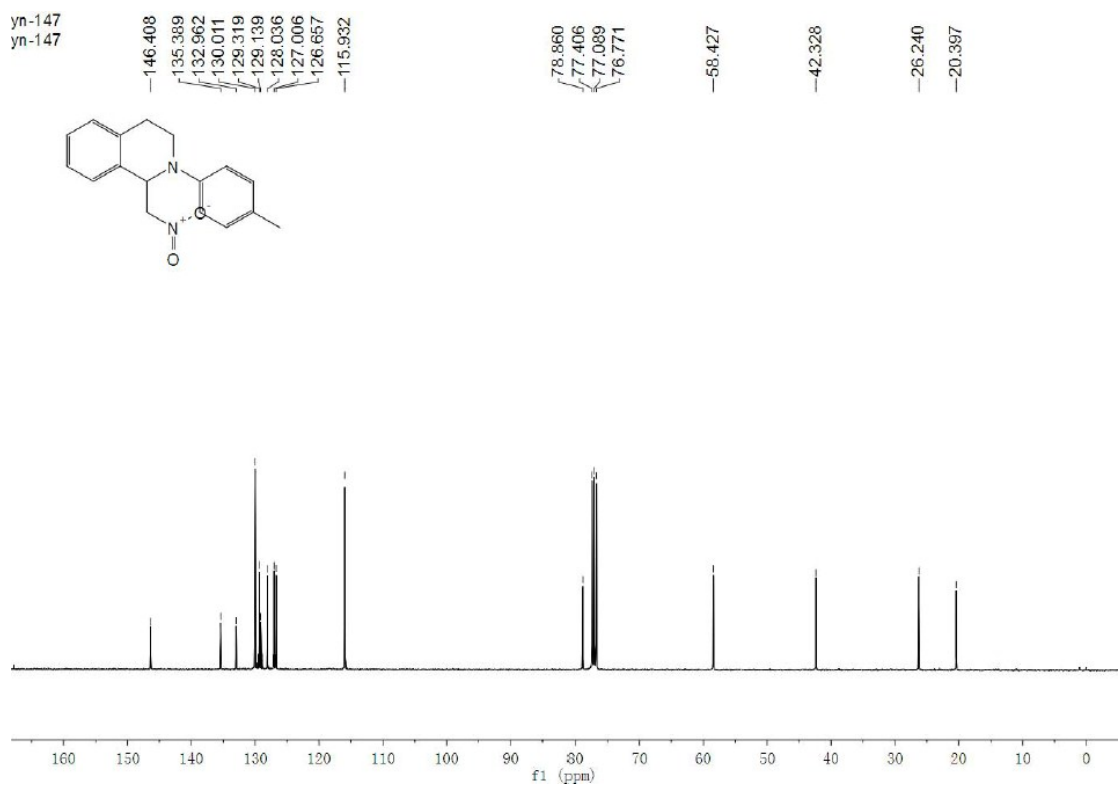

<sup>1</sup>H NMR and <sup>13</sup>C NMR spectra of compound **3b**

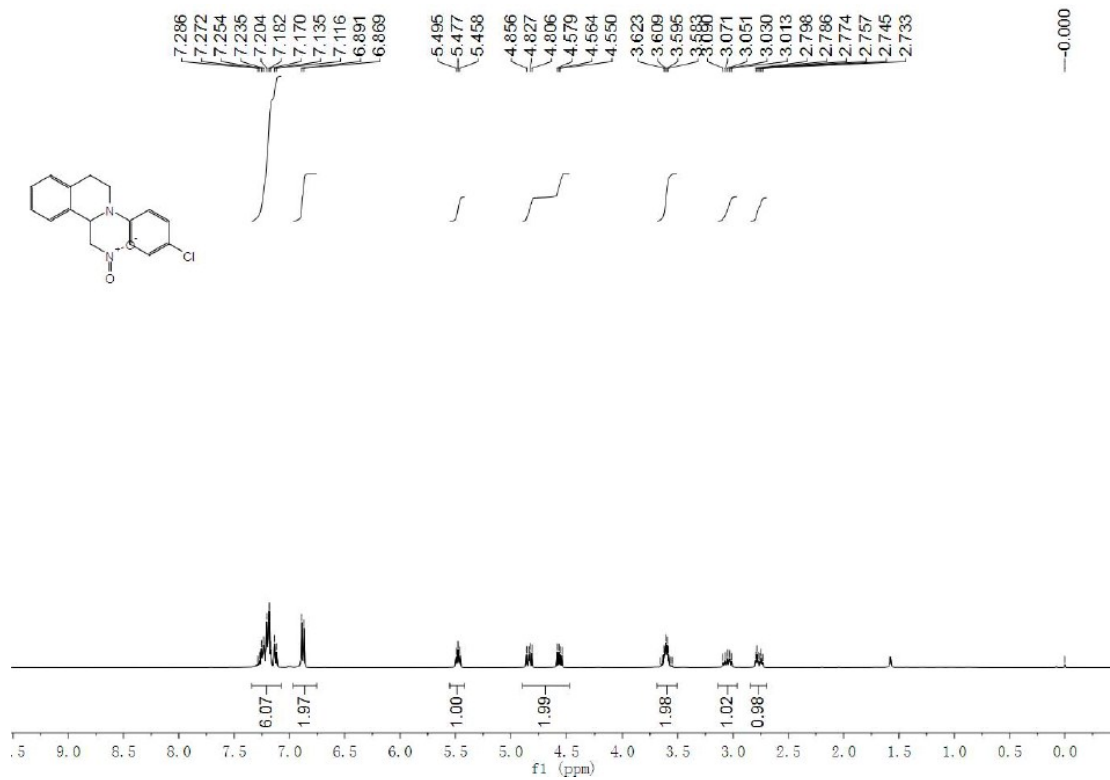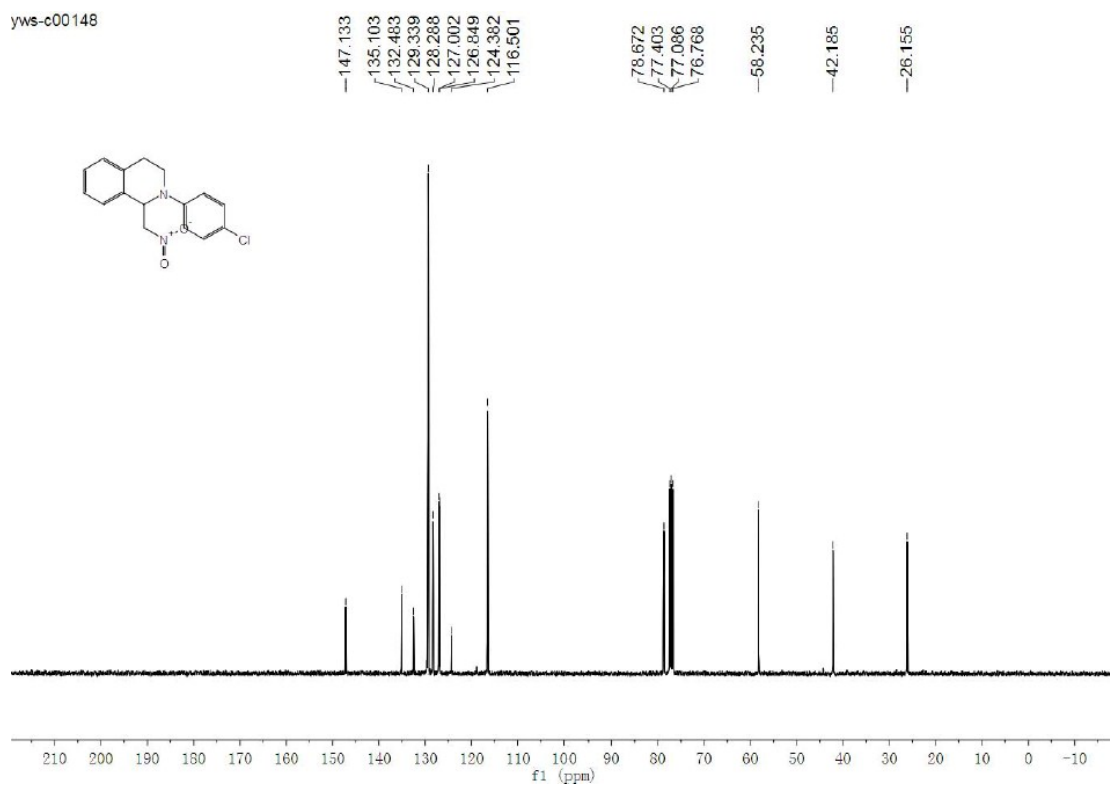

<sup>1</sup>H NMR and <sup>13</sup>C NMR spectra of compound **3c**

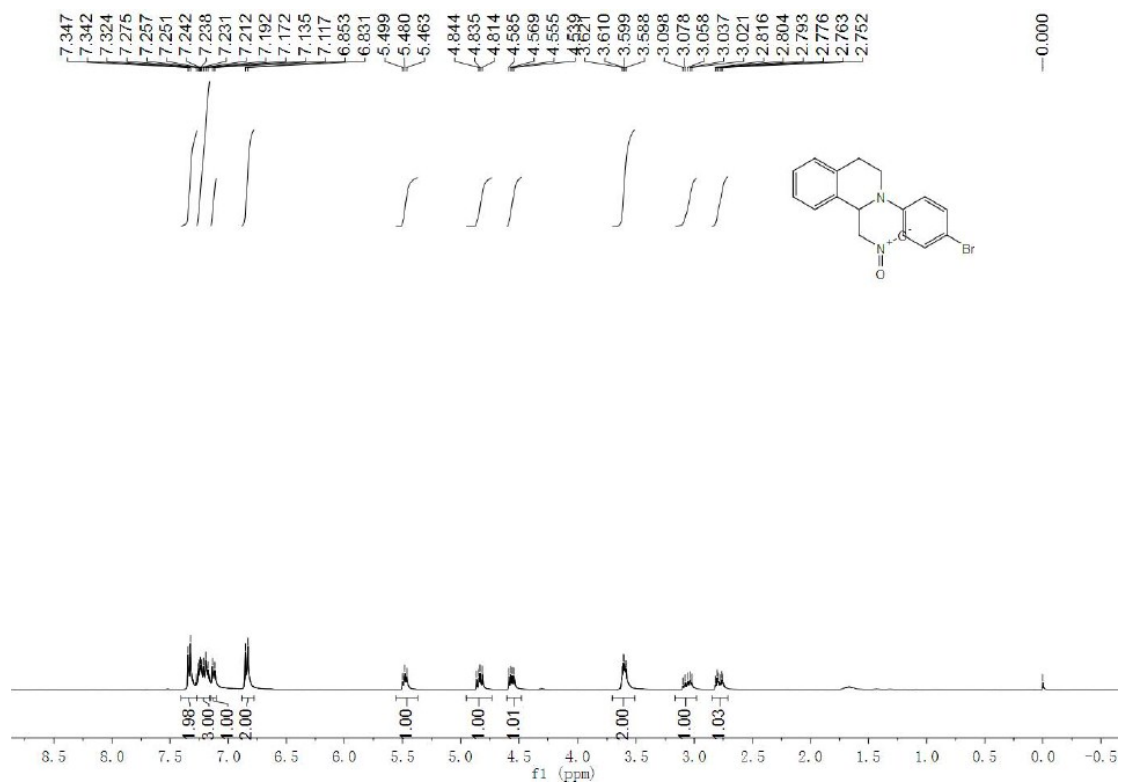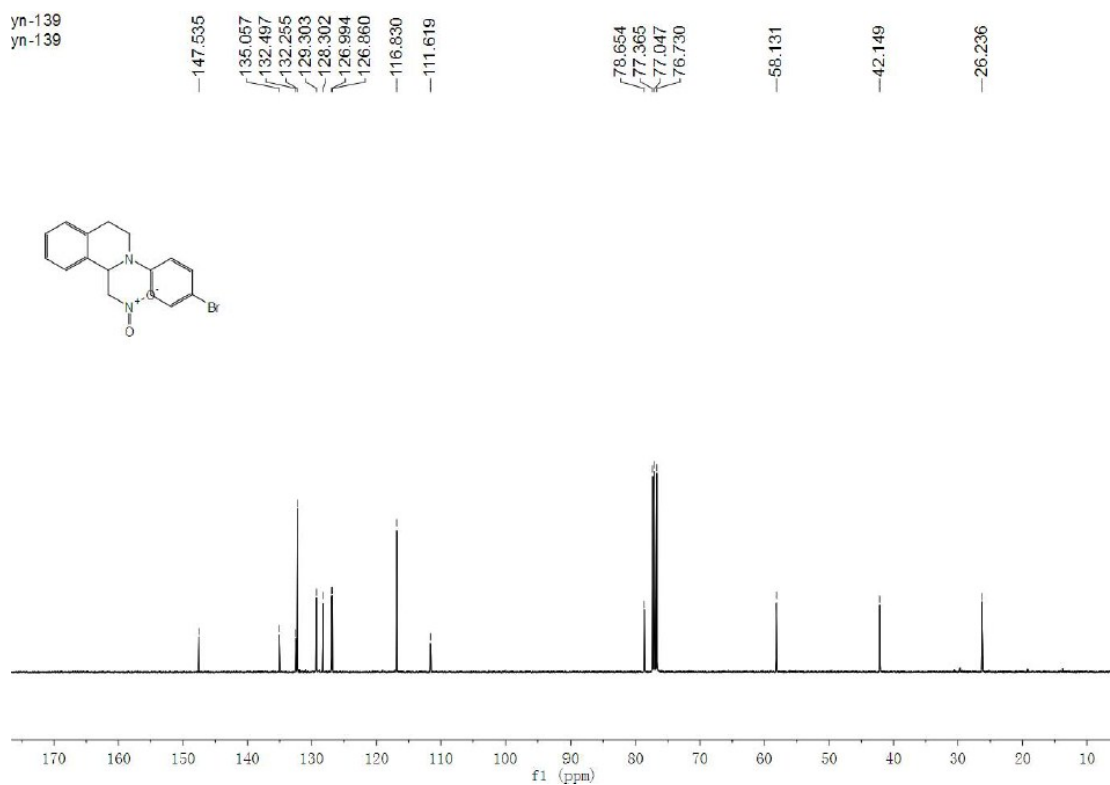

<sup>1</sup>H NMR and <sup>13</sup>C NMR spectra of compound **3d**

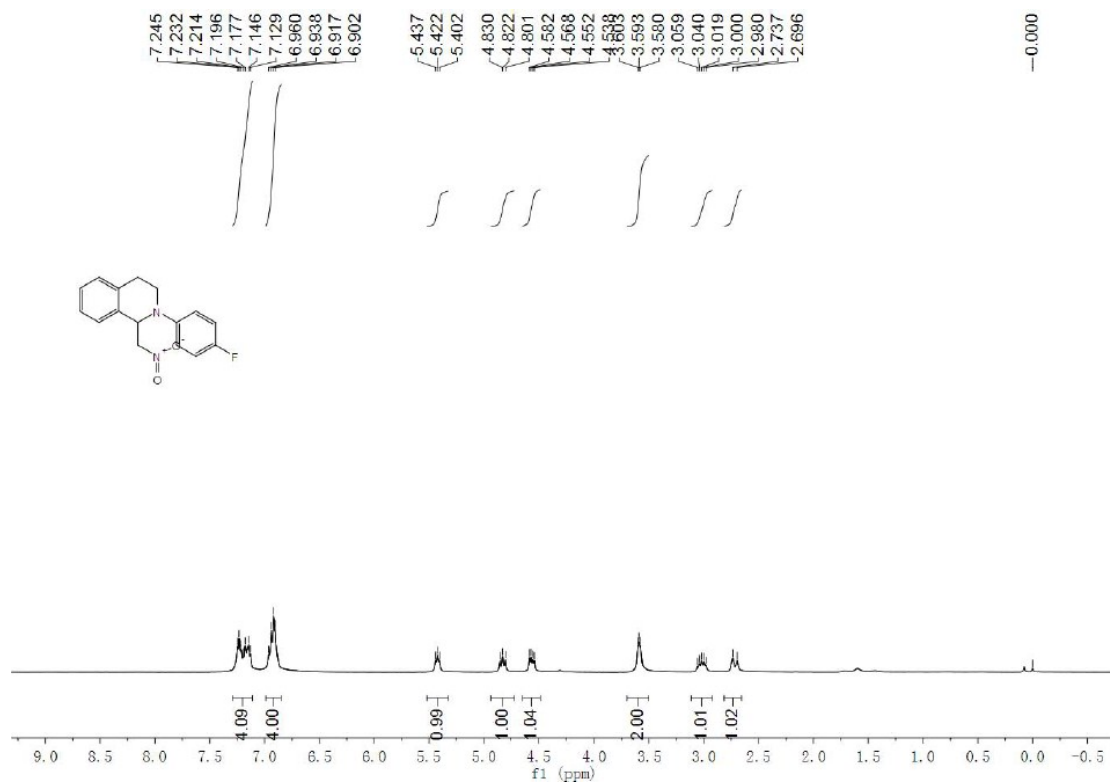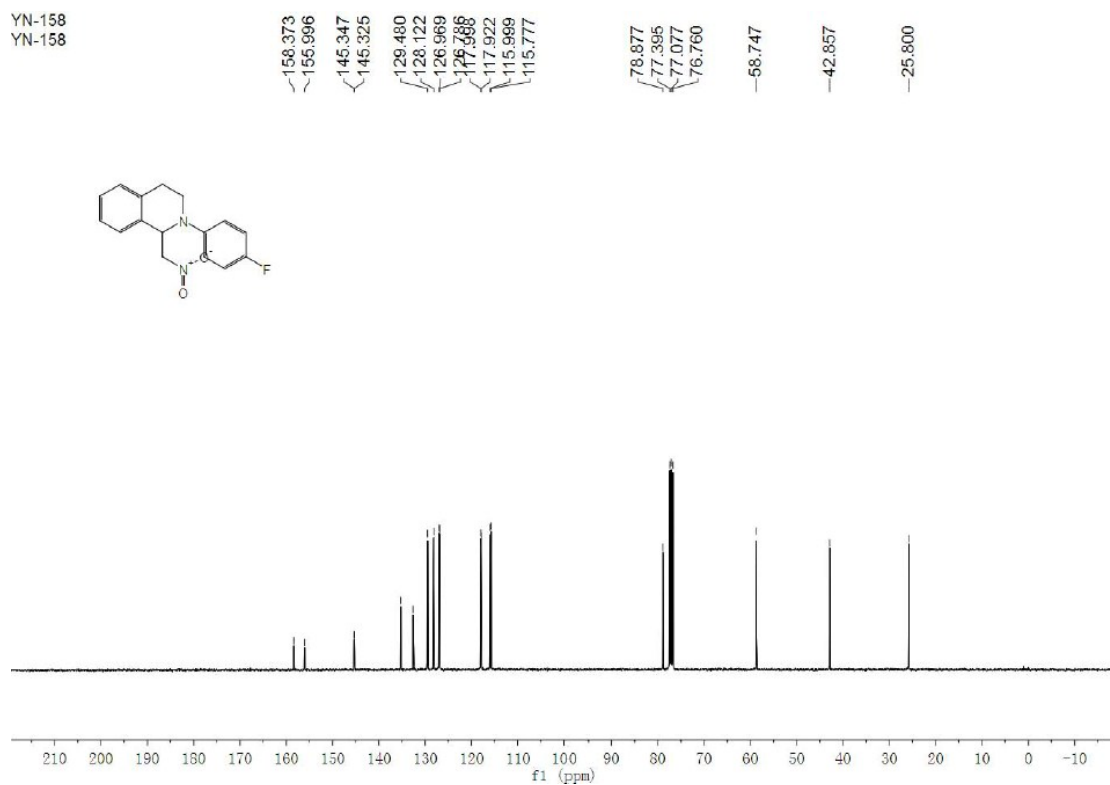

<sup>1</sup>H NMR and <sup>13</sup>C NMR spectra of compound **3e**

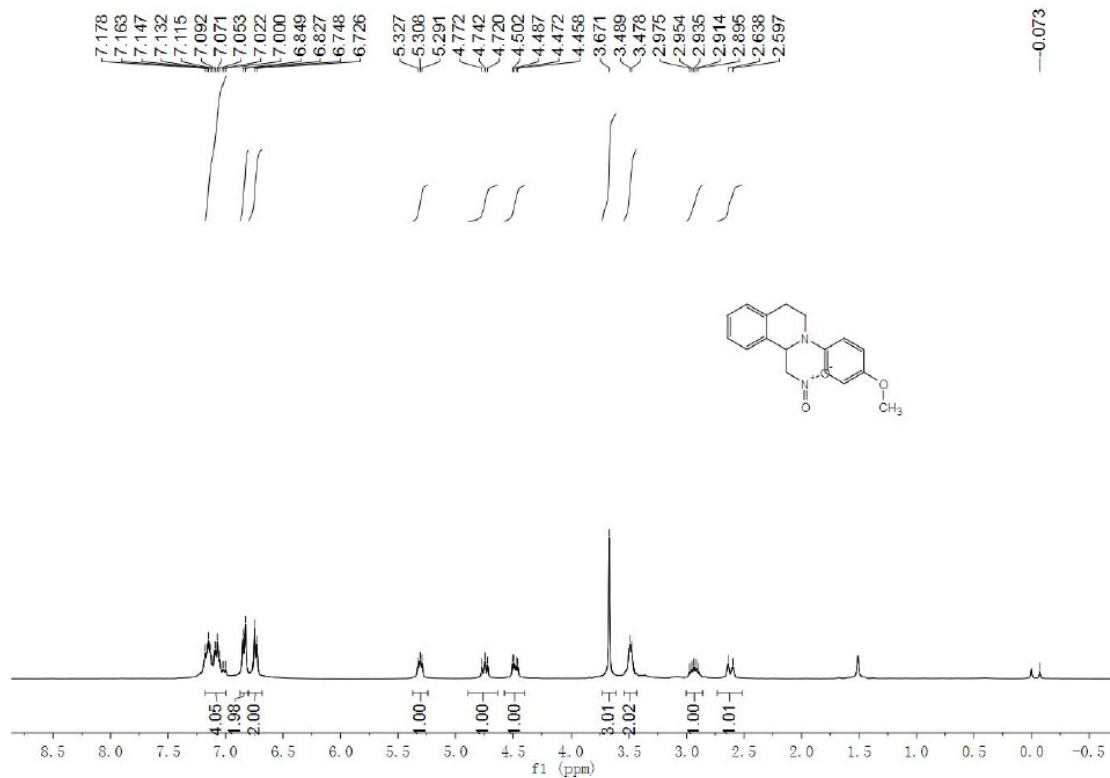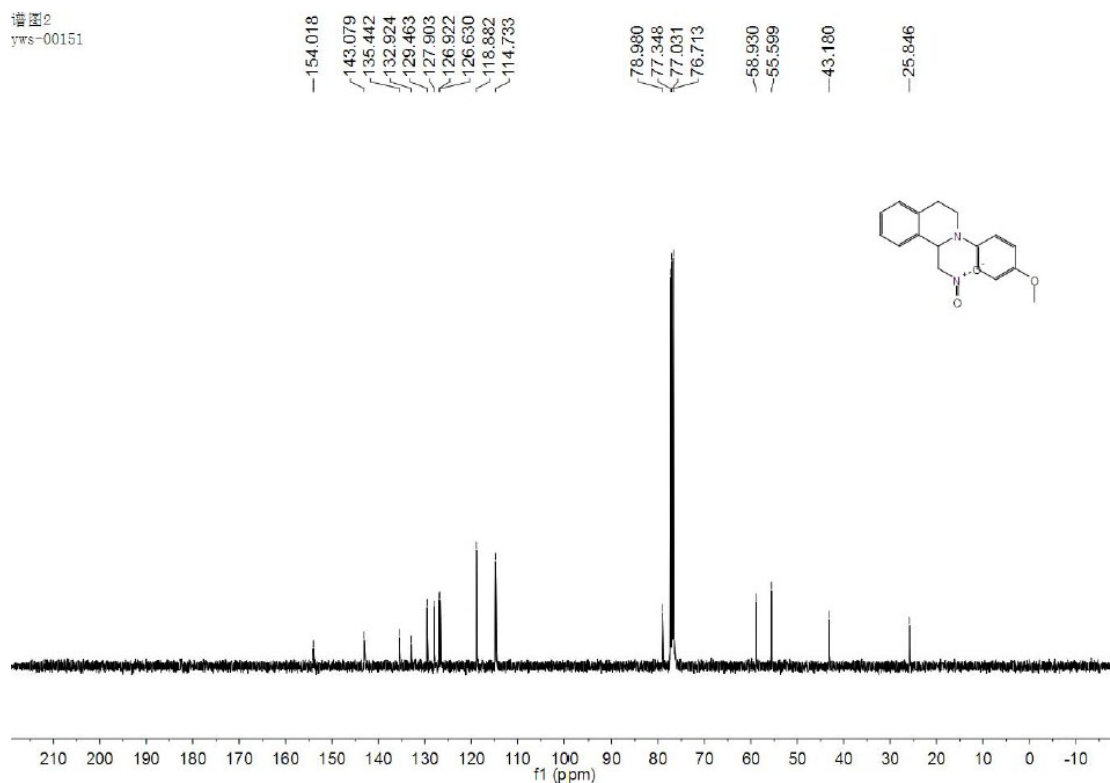

<sup>1</sup>H NMR and <sup>13</sup>C NMR spectra of compound **3f**

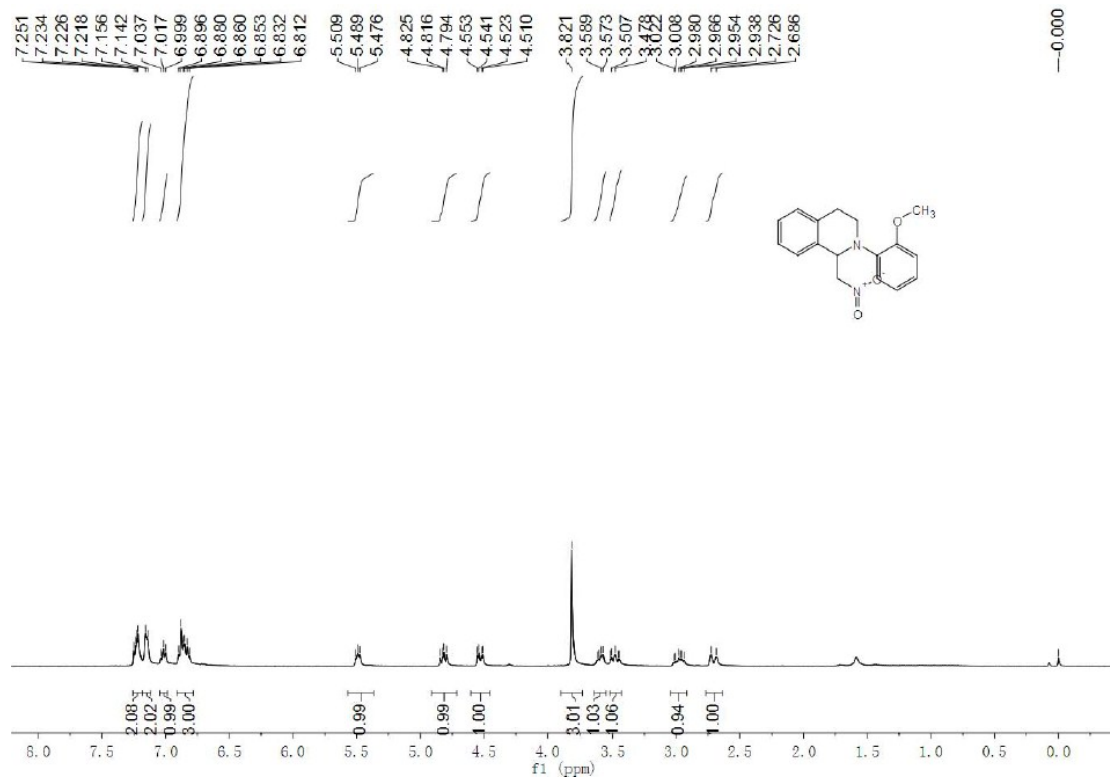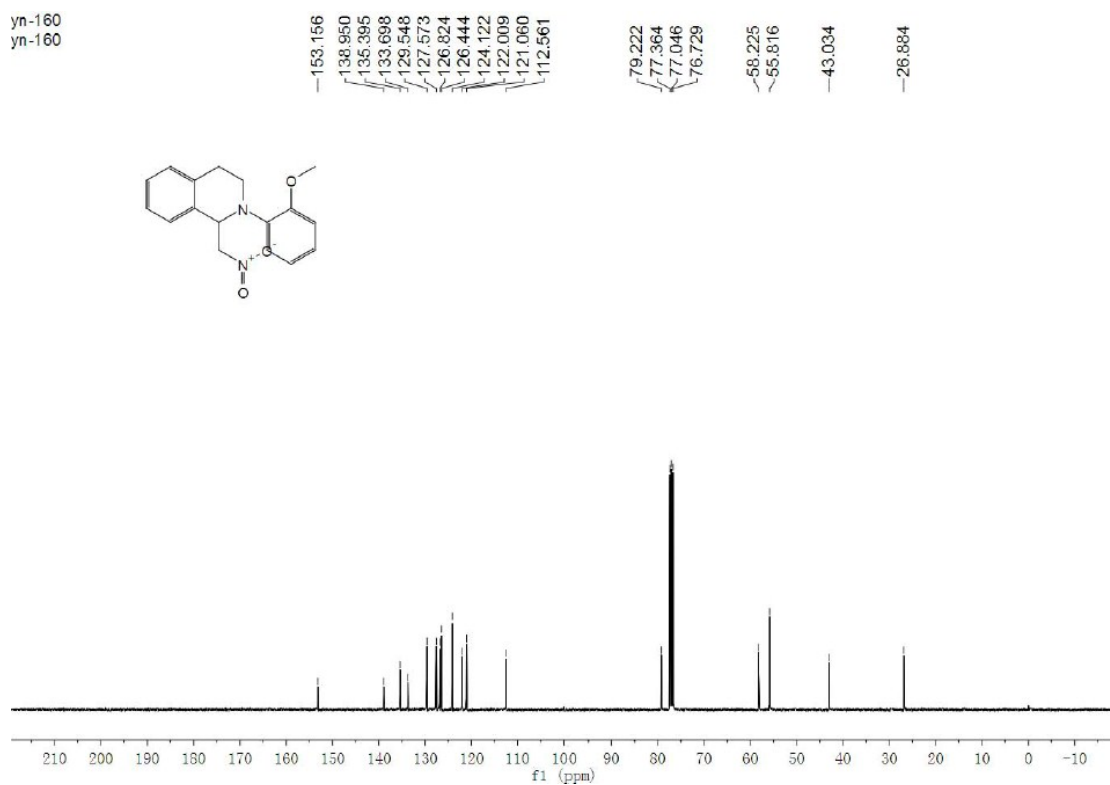

$^1\text{H}$  NMR and  $^{13}\text{C}$  NMR spectra of compound **3g**



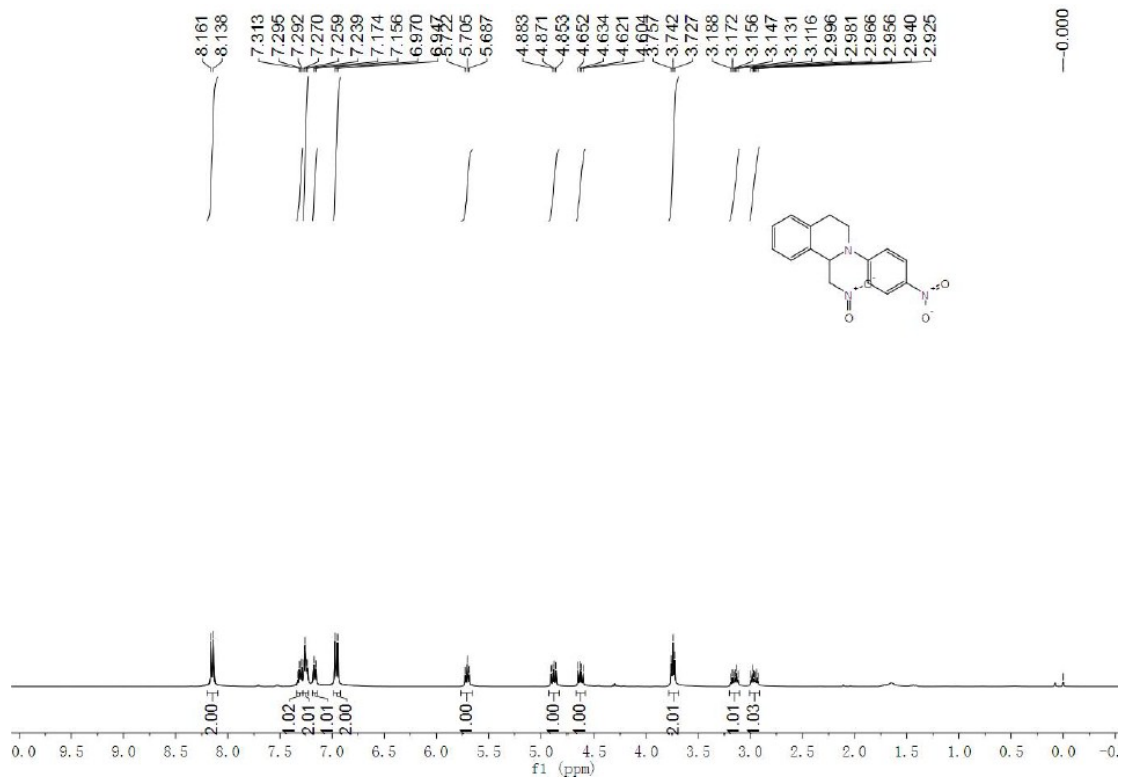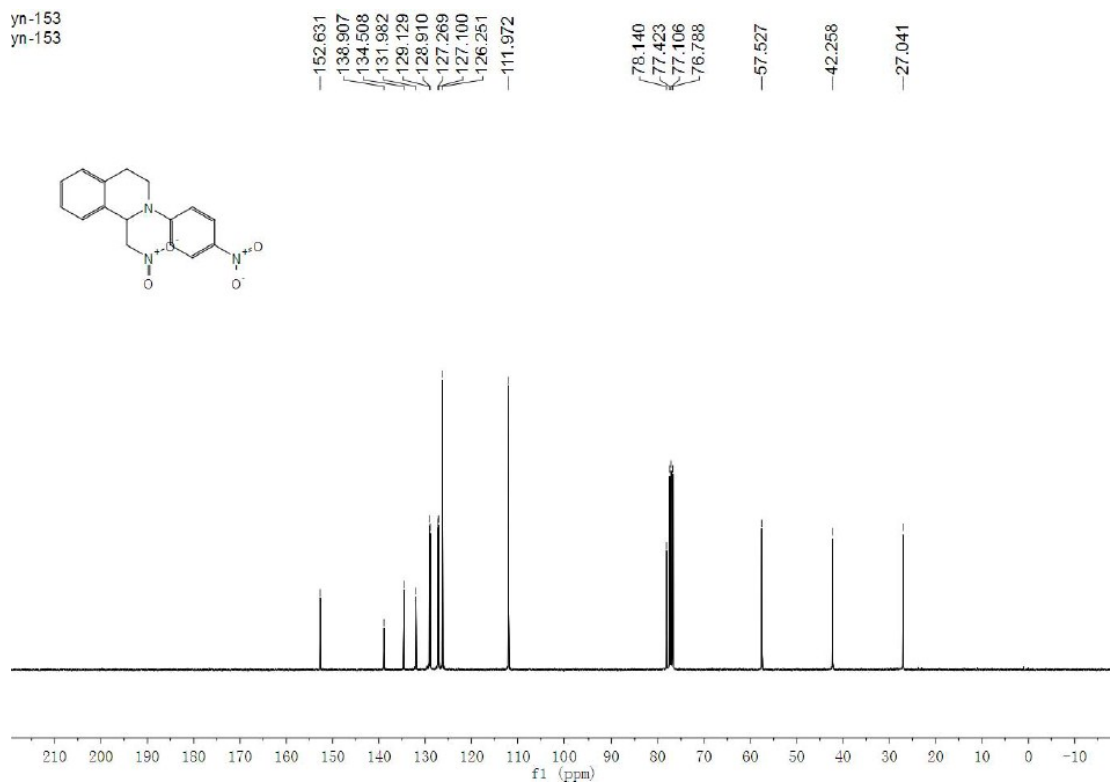

<sup>1</sup>H NMR and <sup>13</sup>C NMR spectra of compound **3h**

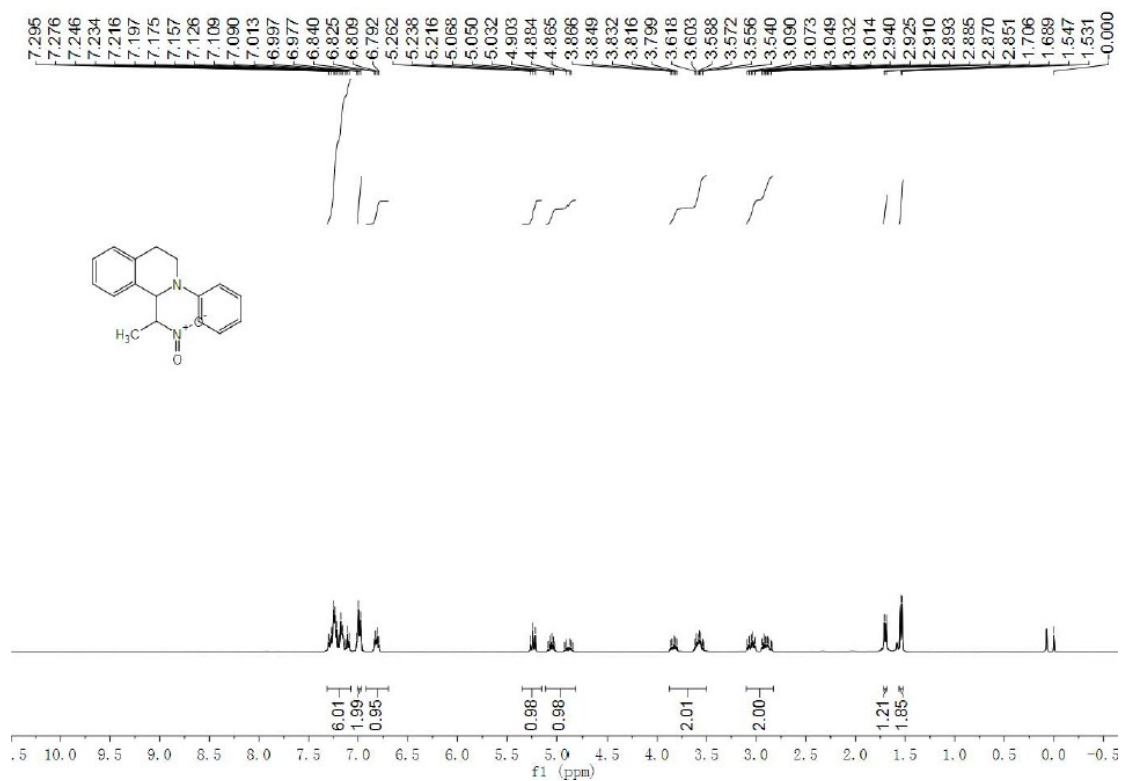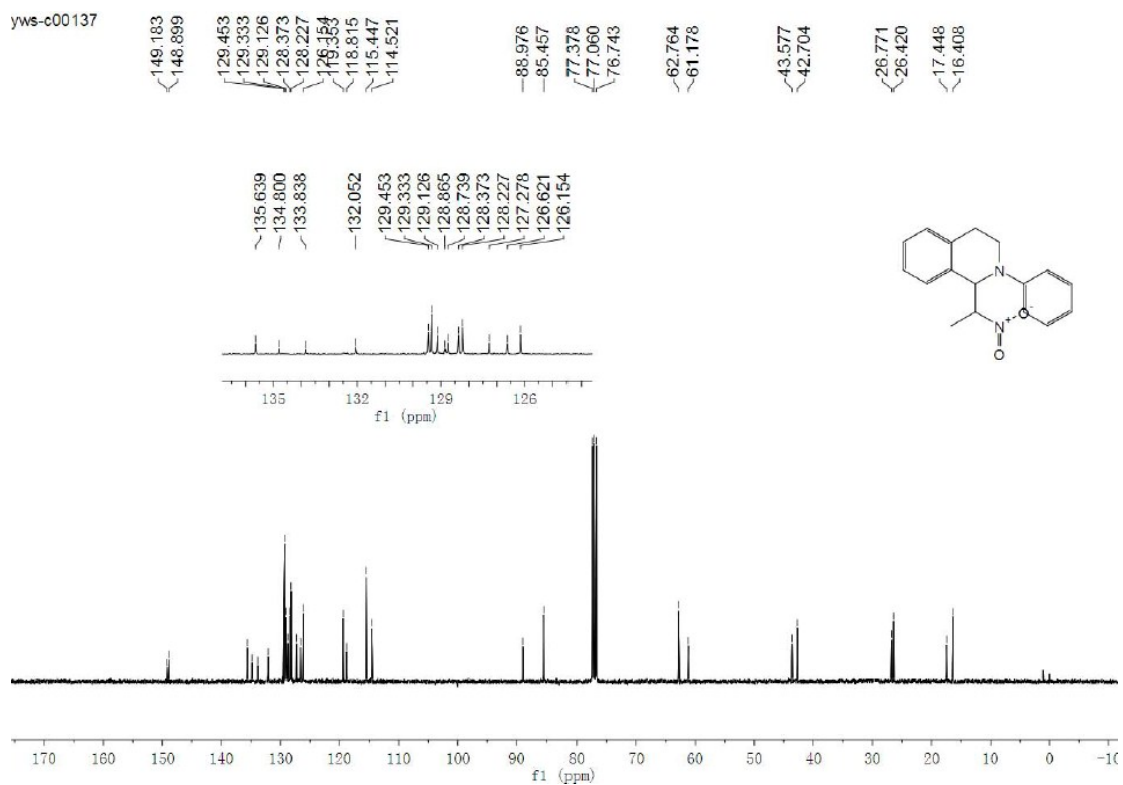

<sup>1</sup>H NMR and <sup>13</sup>C NMR spectra of compound **3i**

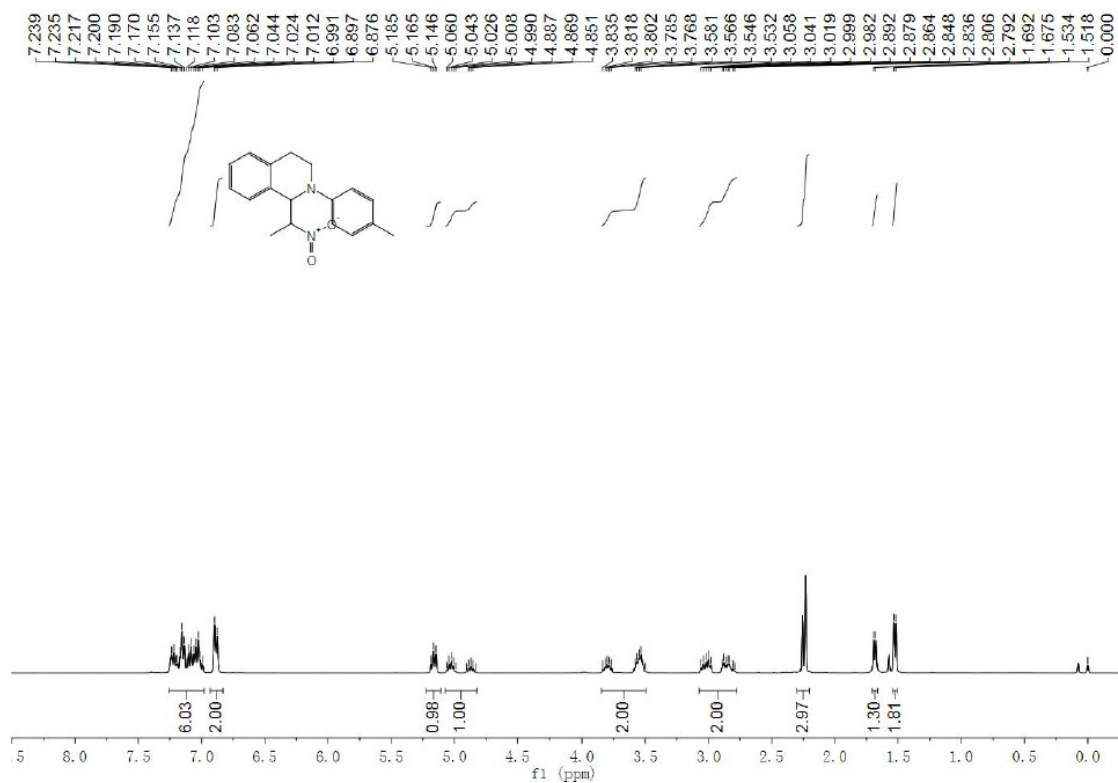

yws-c00149

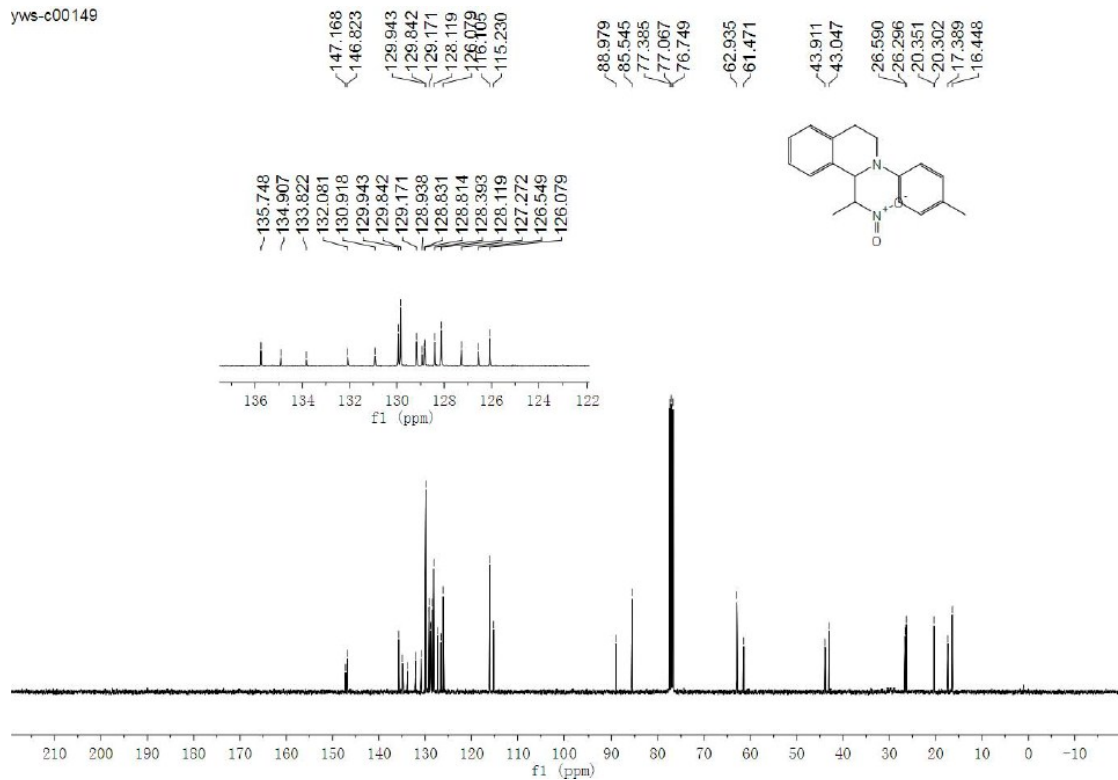

$^1\text{H}$  NMR and  $^{13}\text{C}$  NMR spectra of compound **3j**

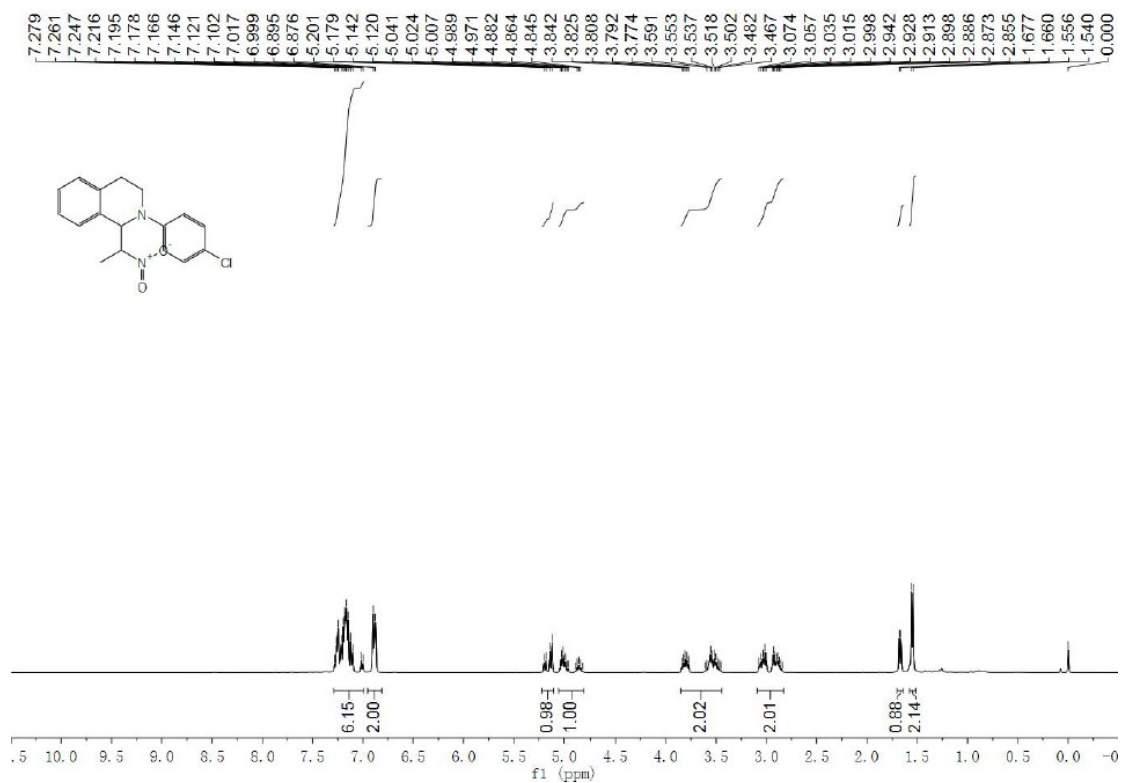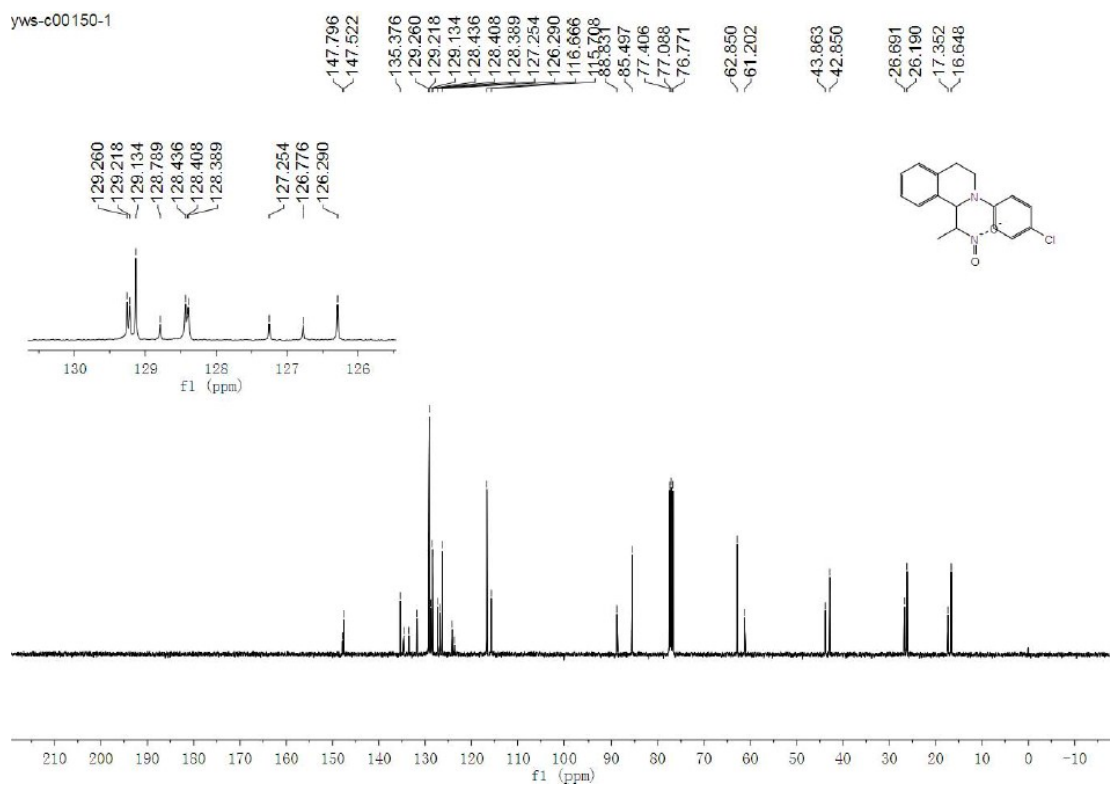

<sup>1</sup>H NMR and <sup>13</sup>C NMR spectra of compound **3k**

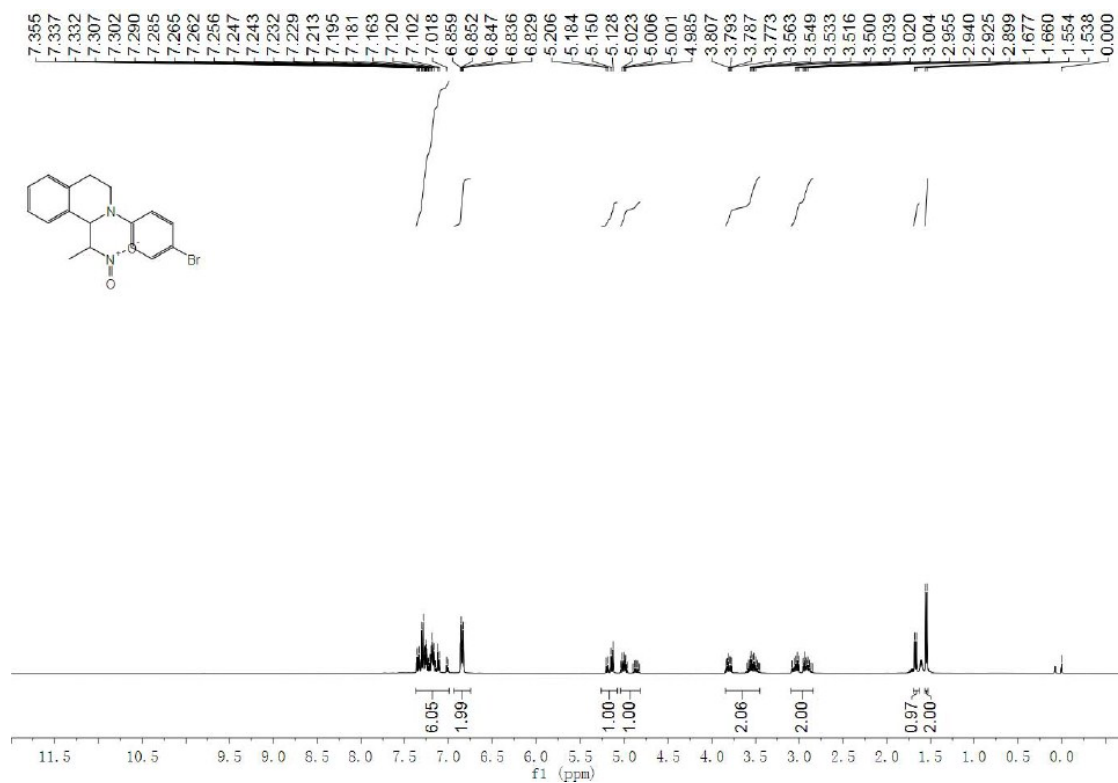

yws-00144

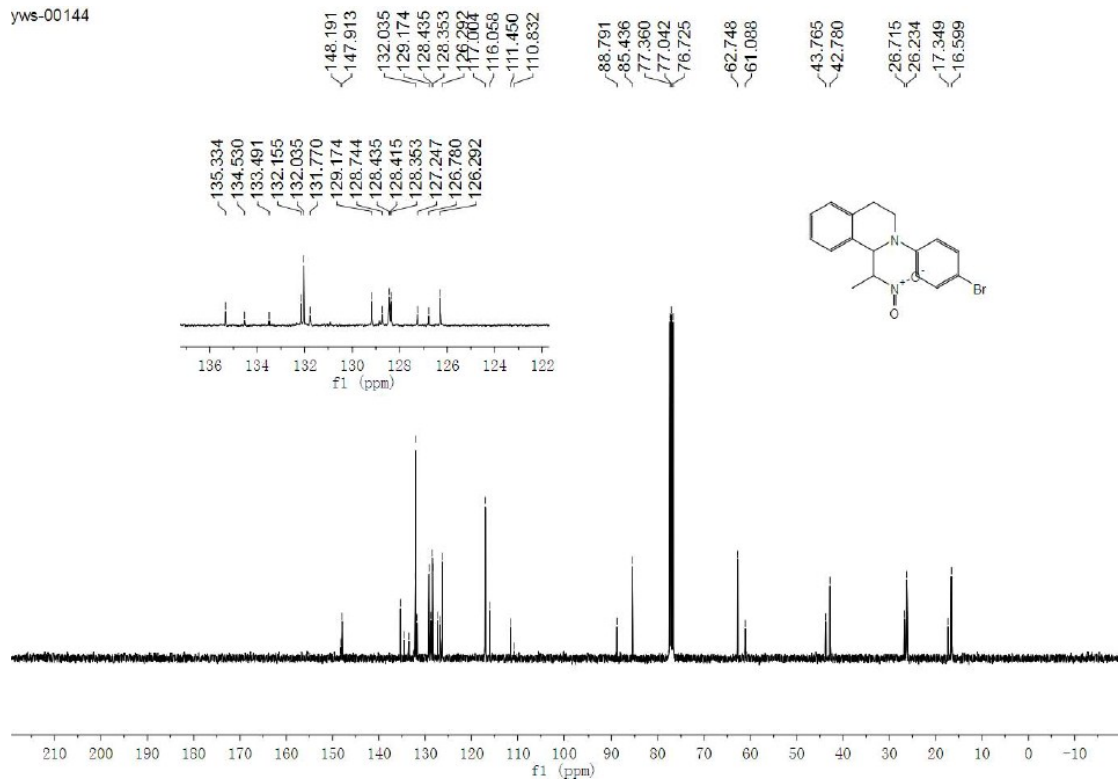

<sup>1</sup>H NMR and <sup>13</sup>C NMR spectra of compound 31

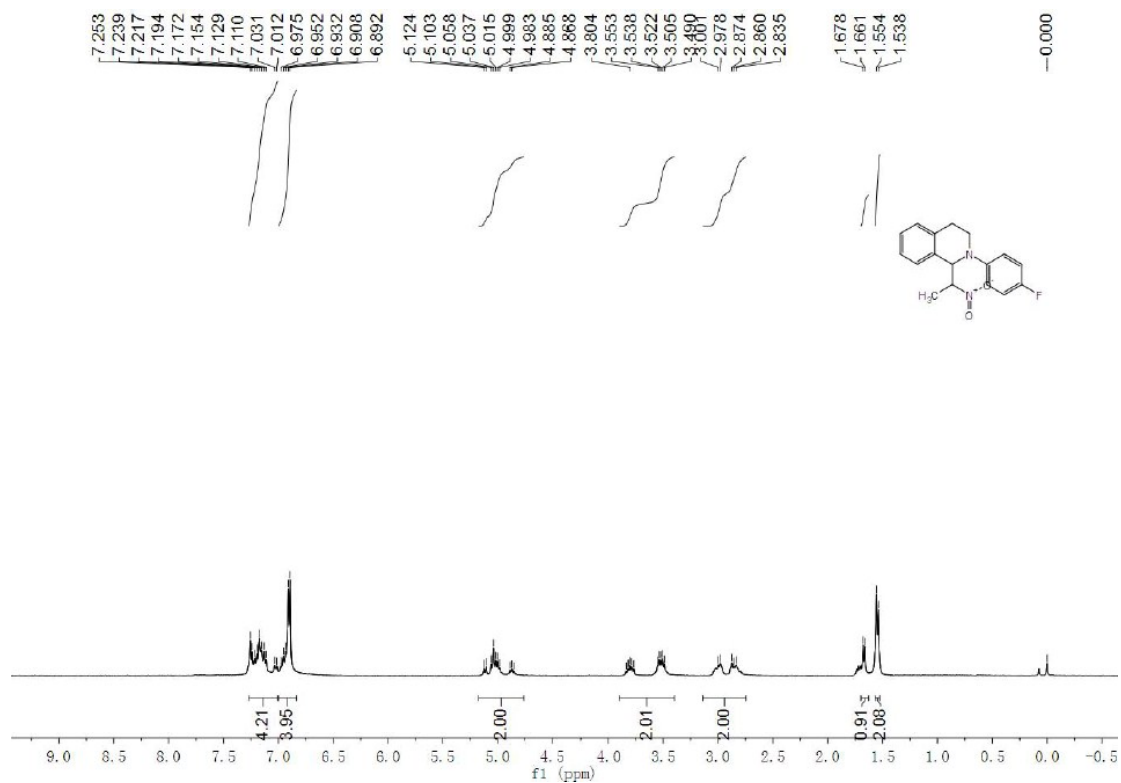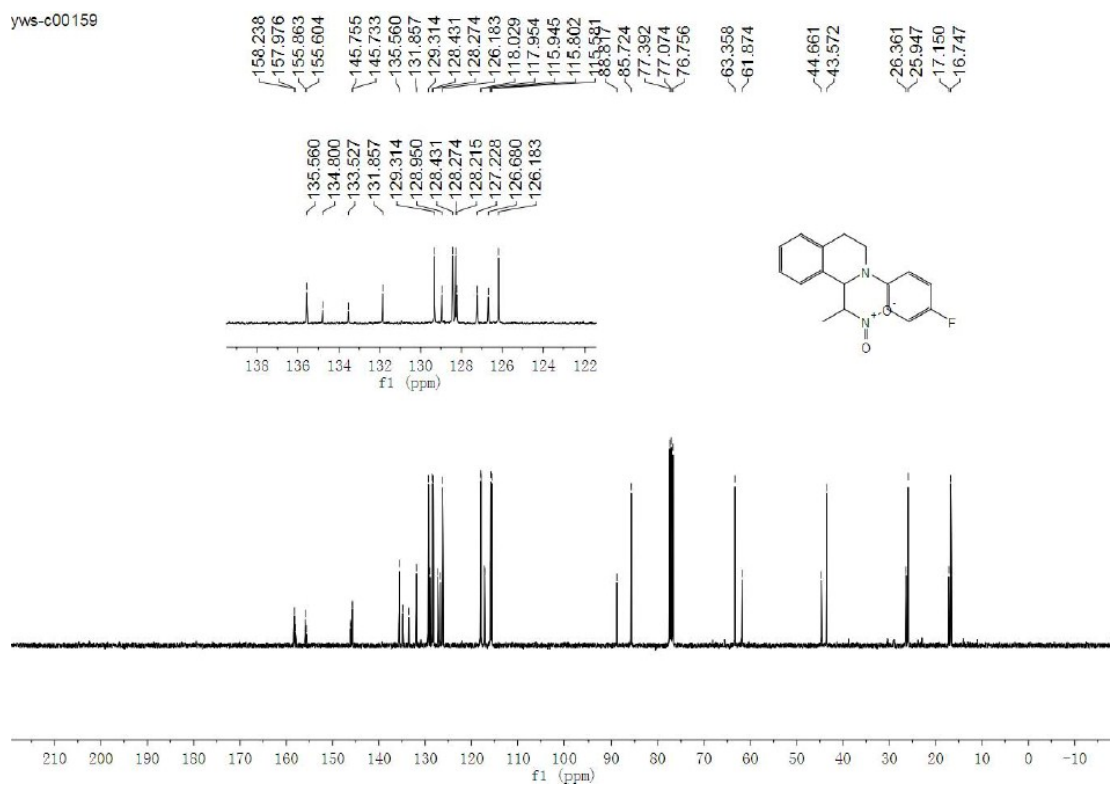

<sup>1</sup>H NMR and <sup>13</sup>C NMR spectra of compound **3m**

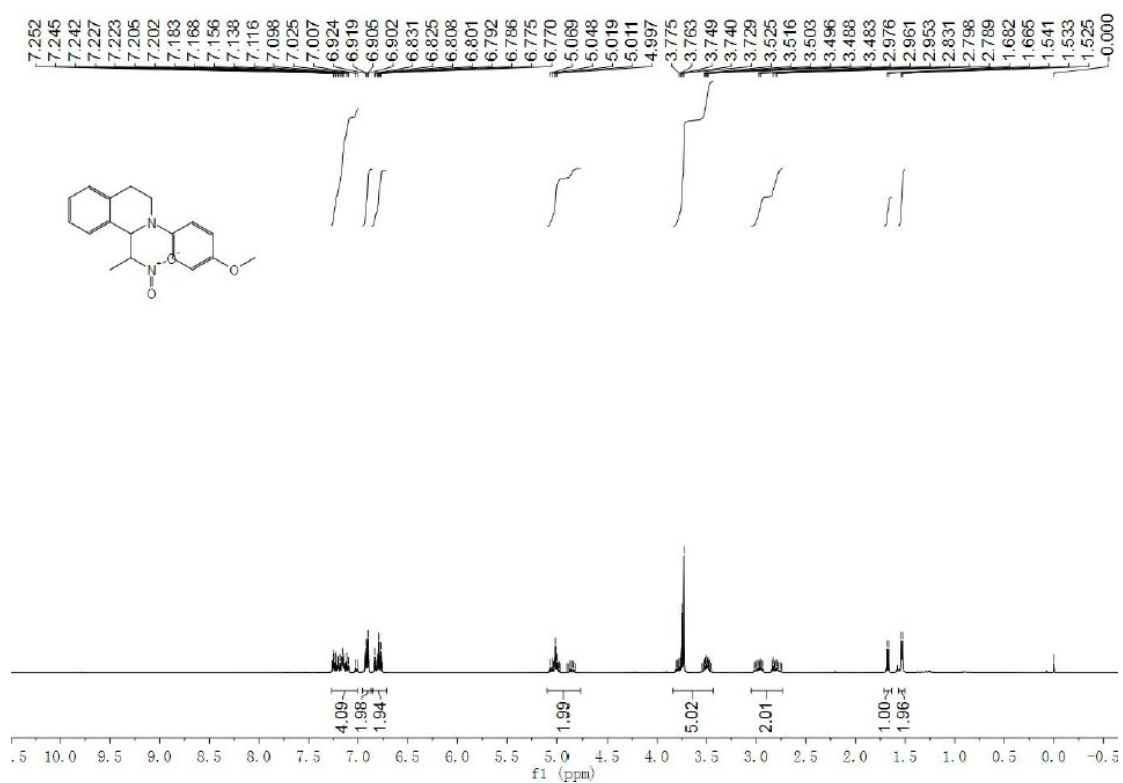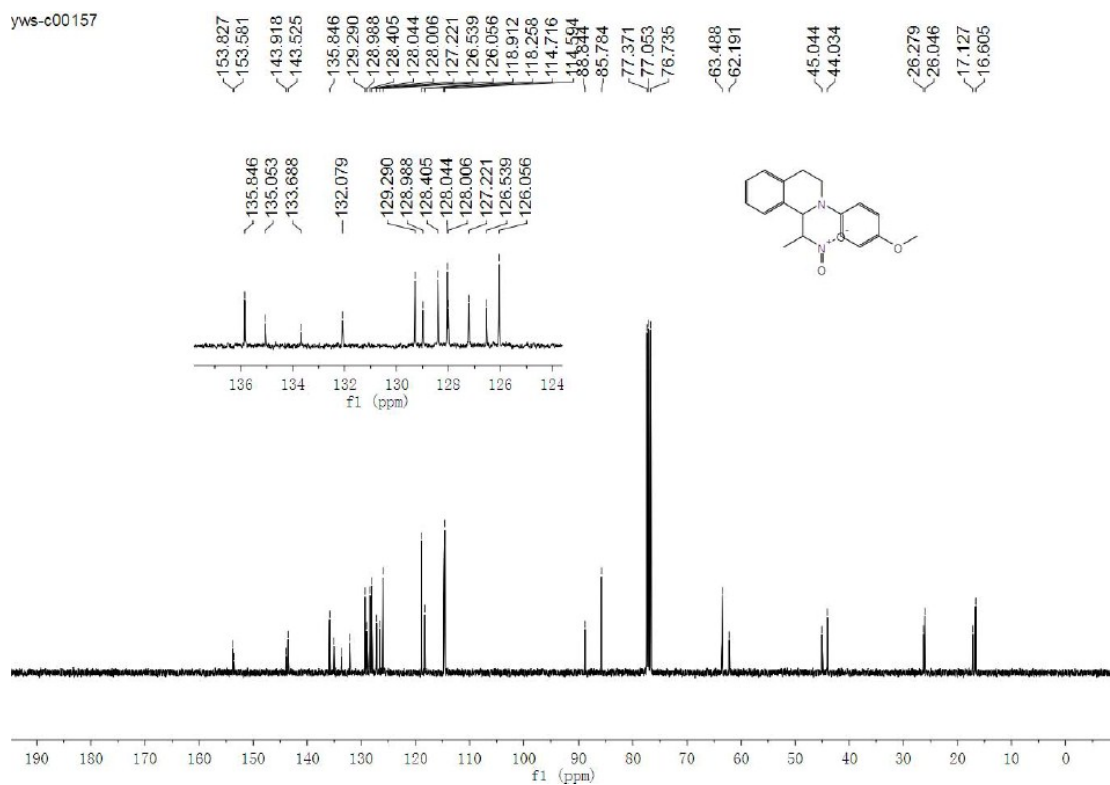

<sup>1</sup>H NMR and <sup>13</sup>C NMR spectra of compound **3n**

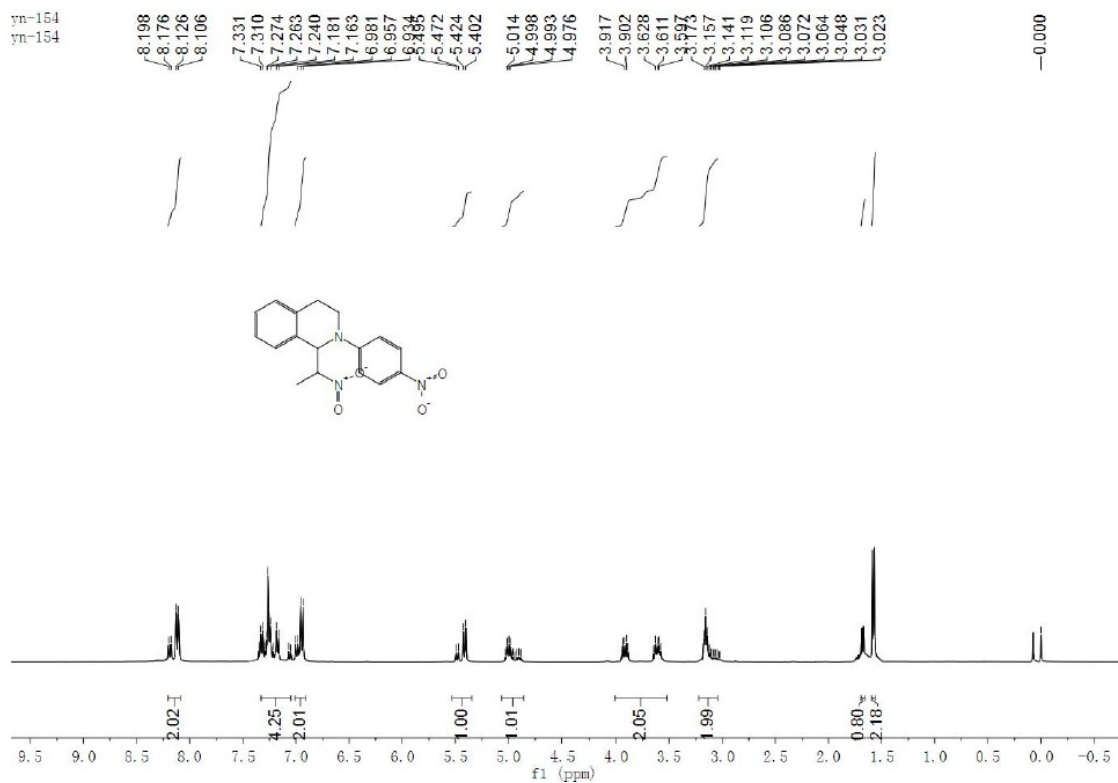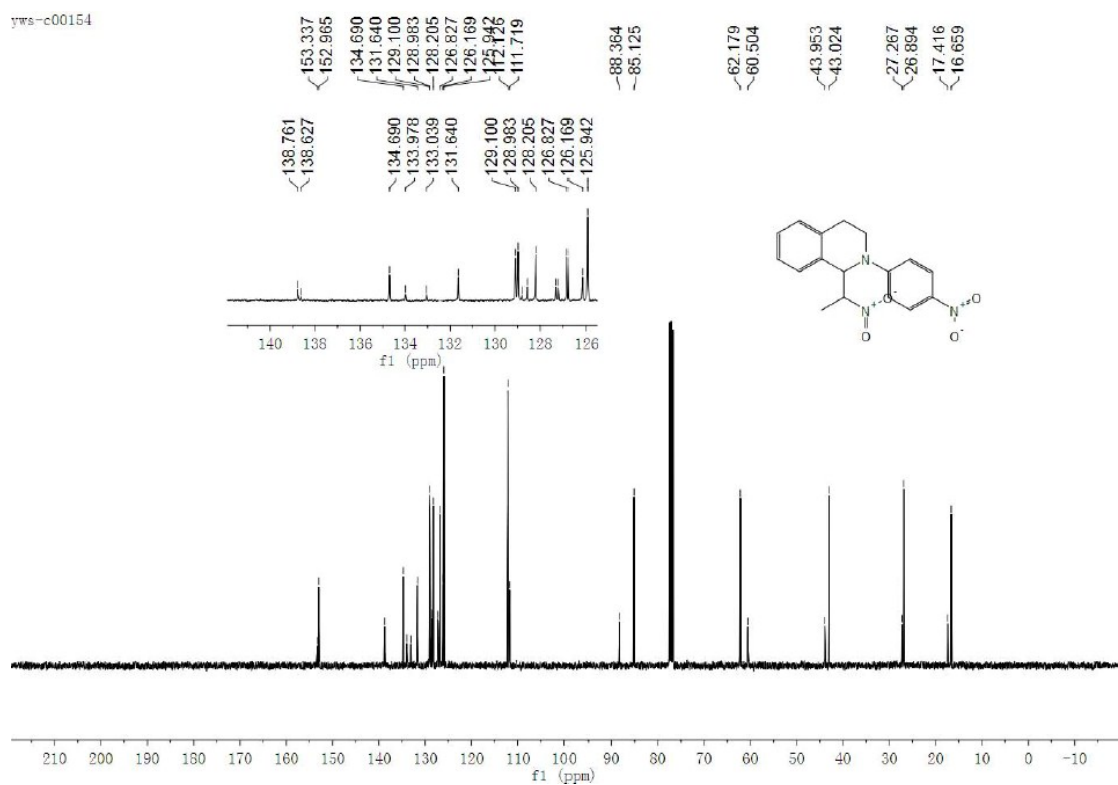

<sup>1</sup>H NMR and <sup>13</sup>C NMR spectra of compound **30**



1dy-2

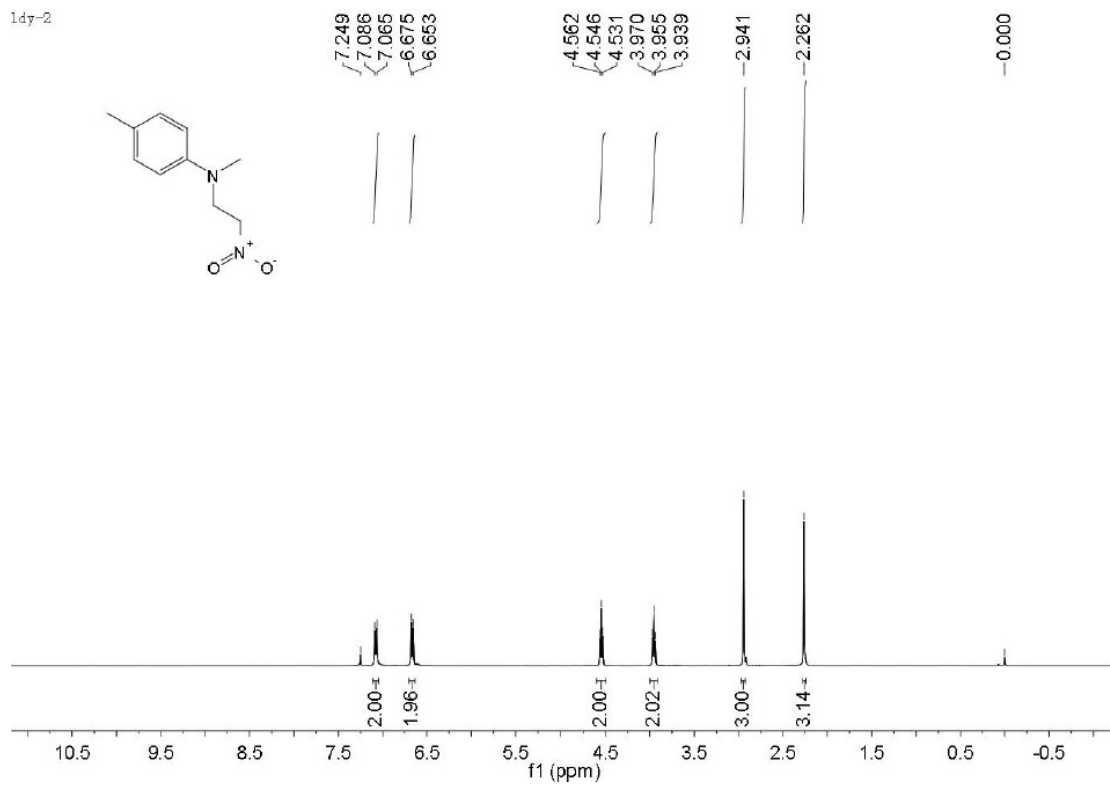

1dy-2-1

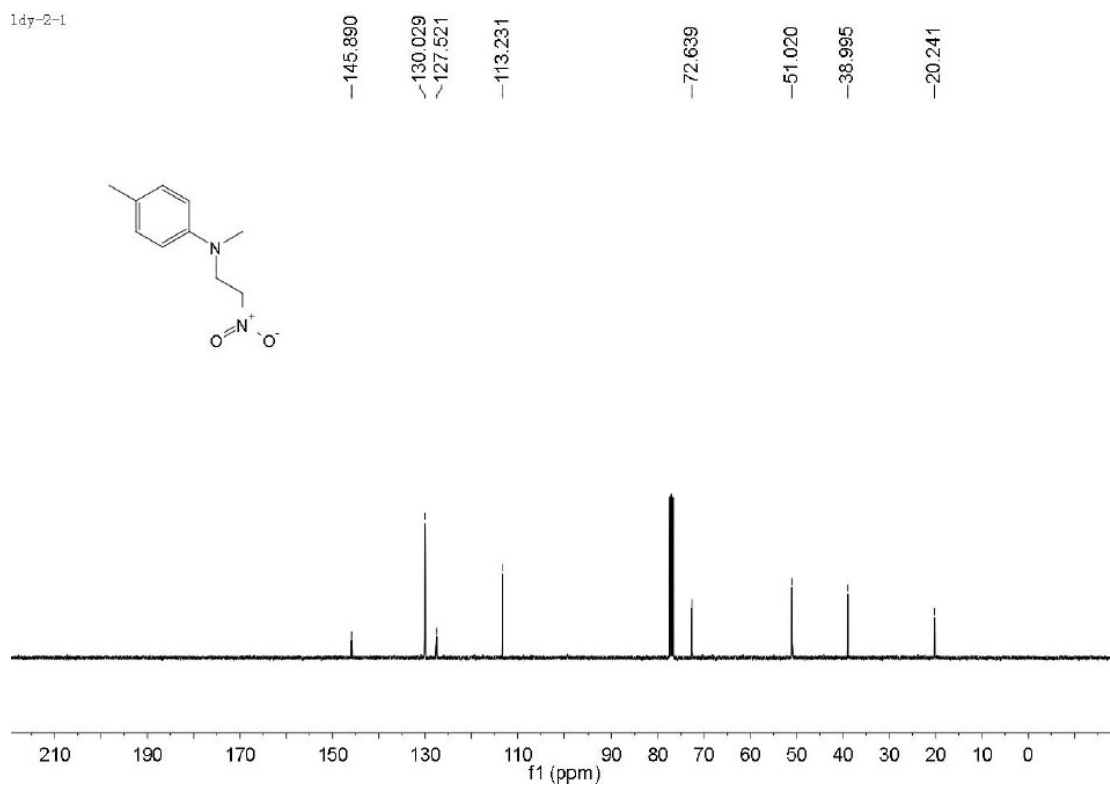

<sup>1</sup>H NMR and <sup>13</sup>C NMR spectra of compound 3p

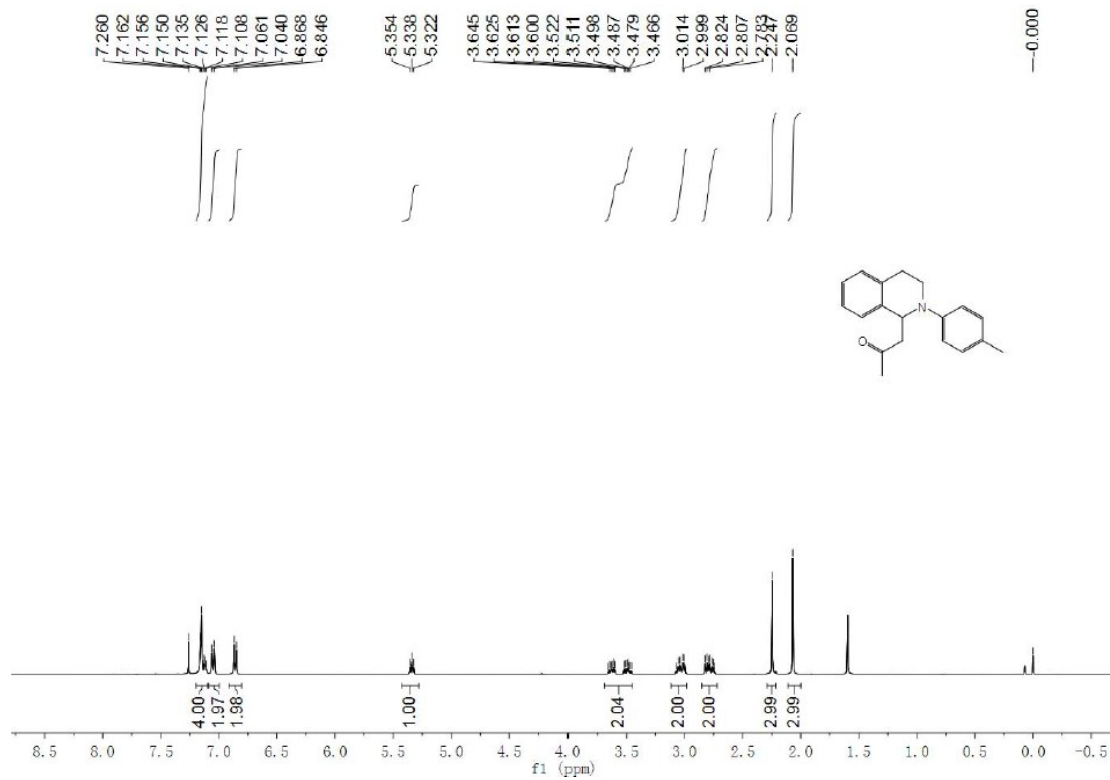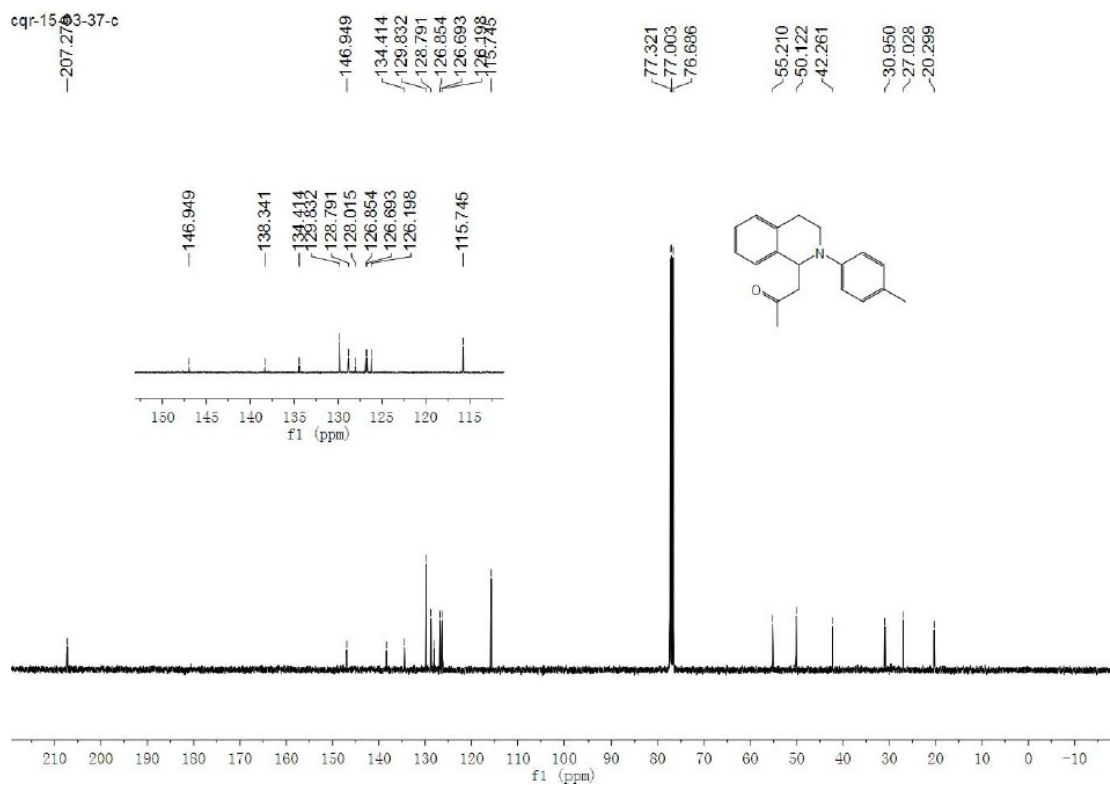

<sup>1</sup>H NMR and <sup>13</sup>C NMR spectra of compound **3q**

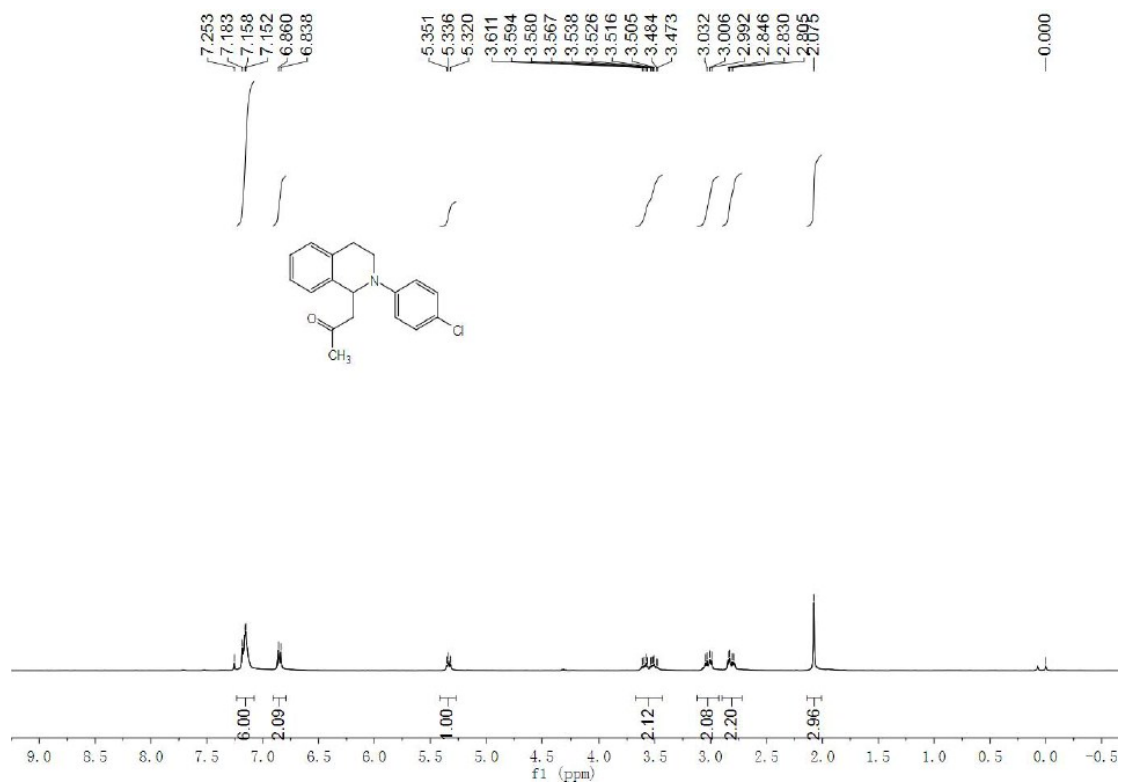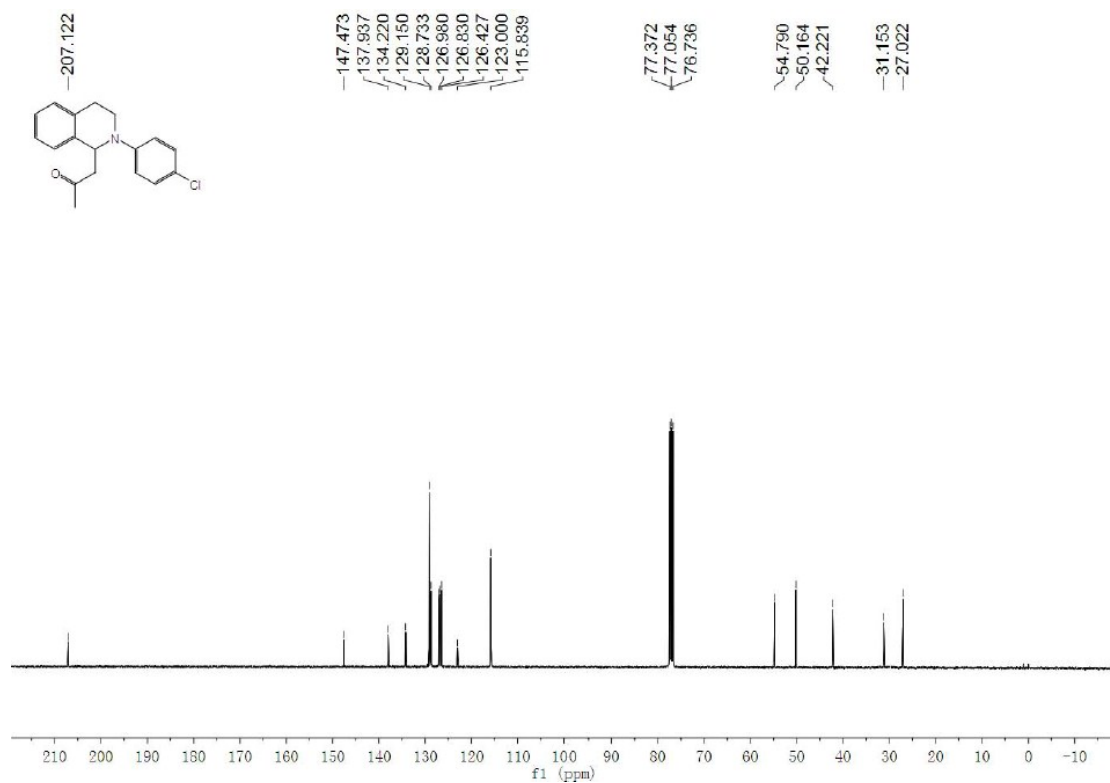

<sup>1</sup>H NMR and <sup>13</sup>C NMR spectra of compound 3r

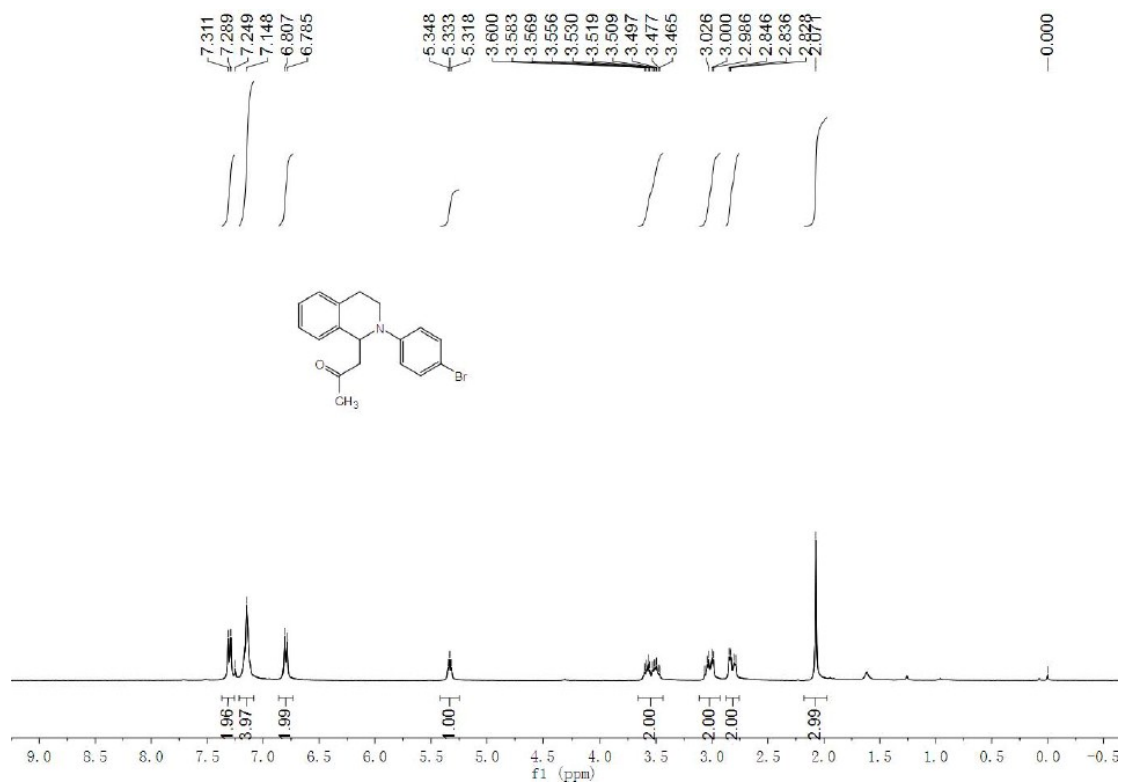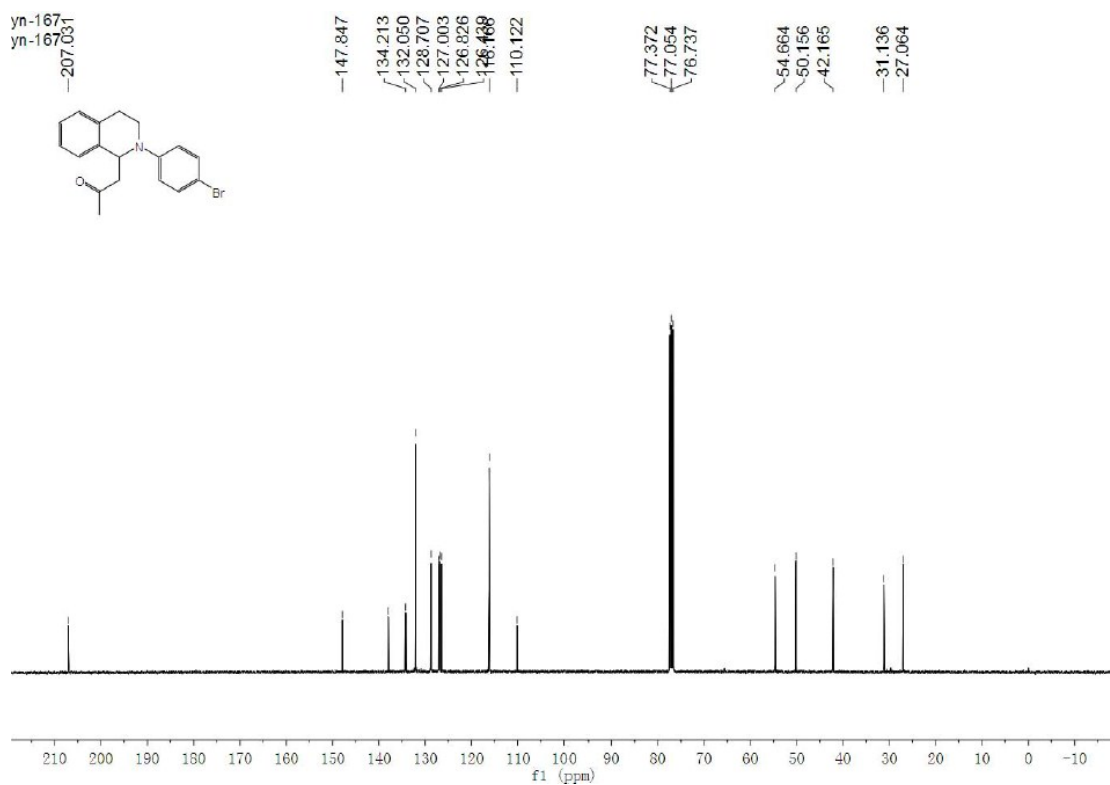

<sup>1</sup>H NMR and <sup>13</sup>C NMR spectra of compound 3s

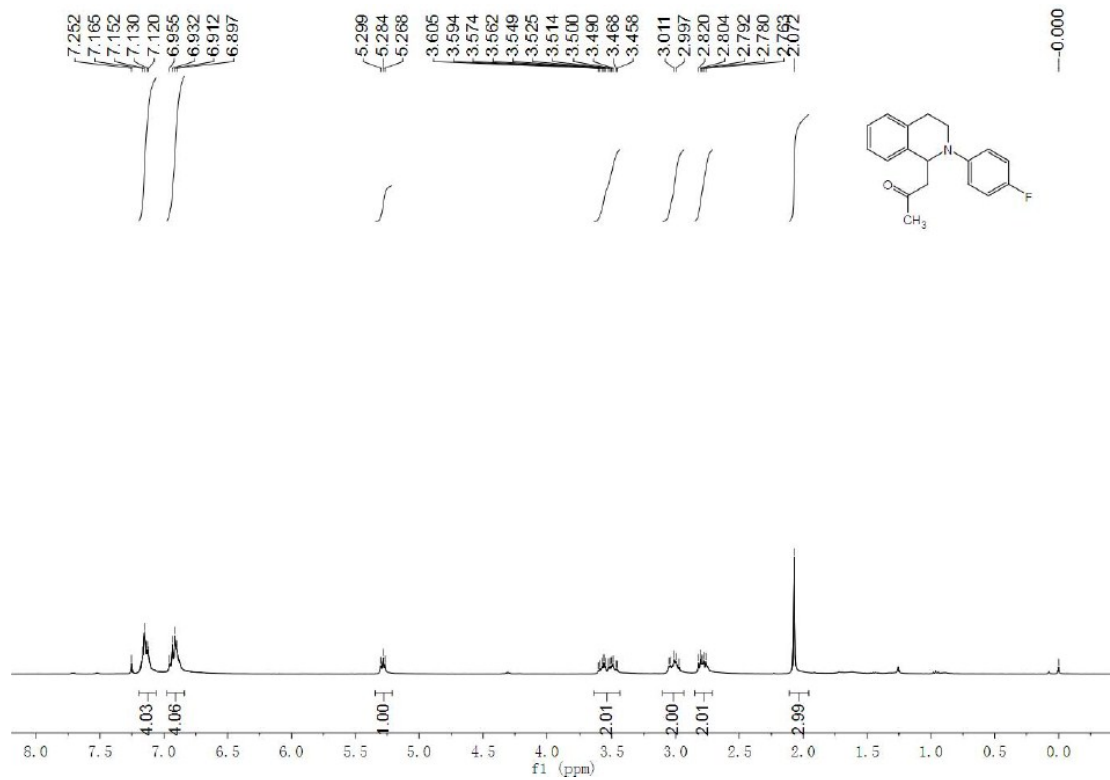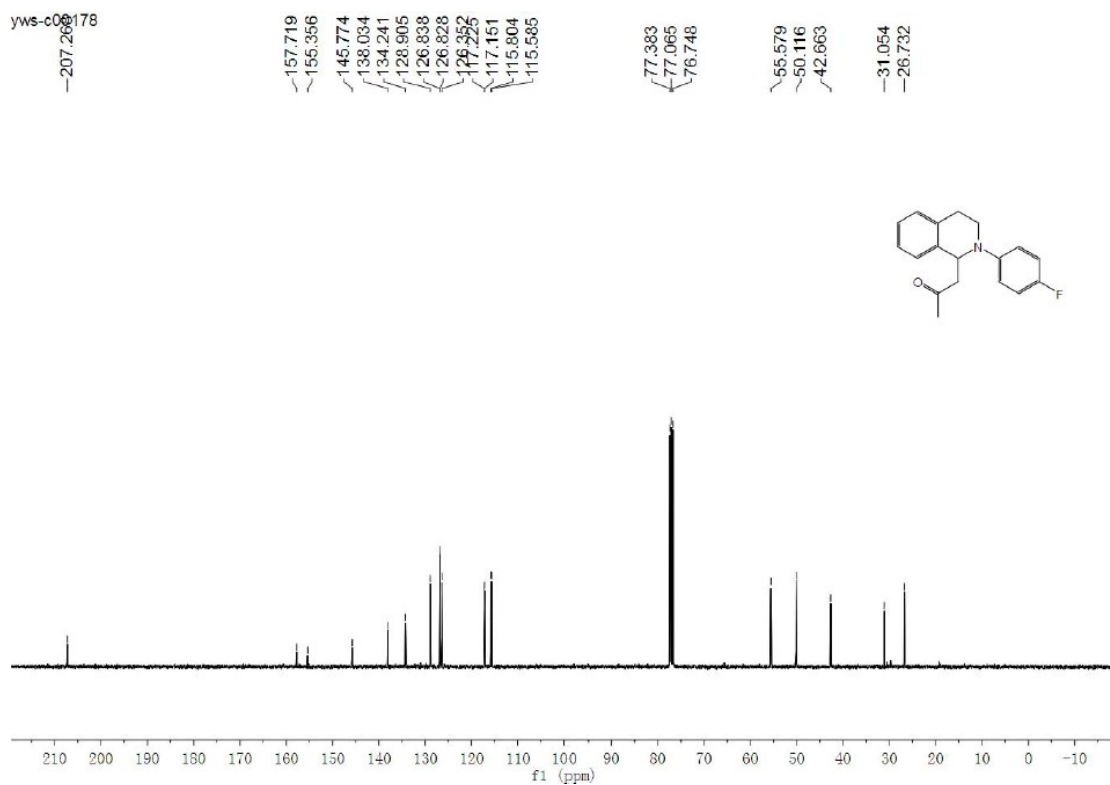

<sup>1</sup>H NMR and <sup>13</sup>C NMR spectra of compound 3t

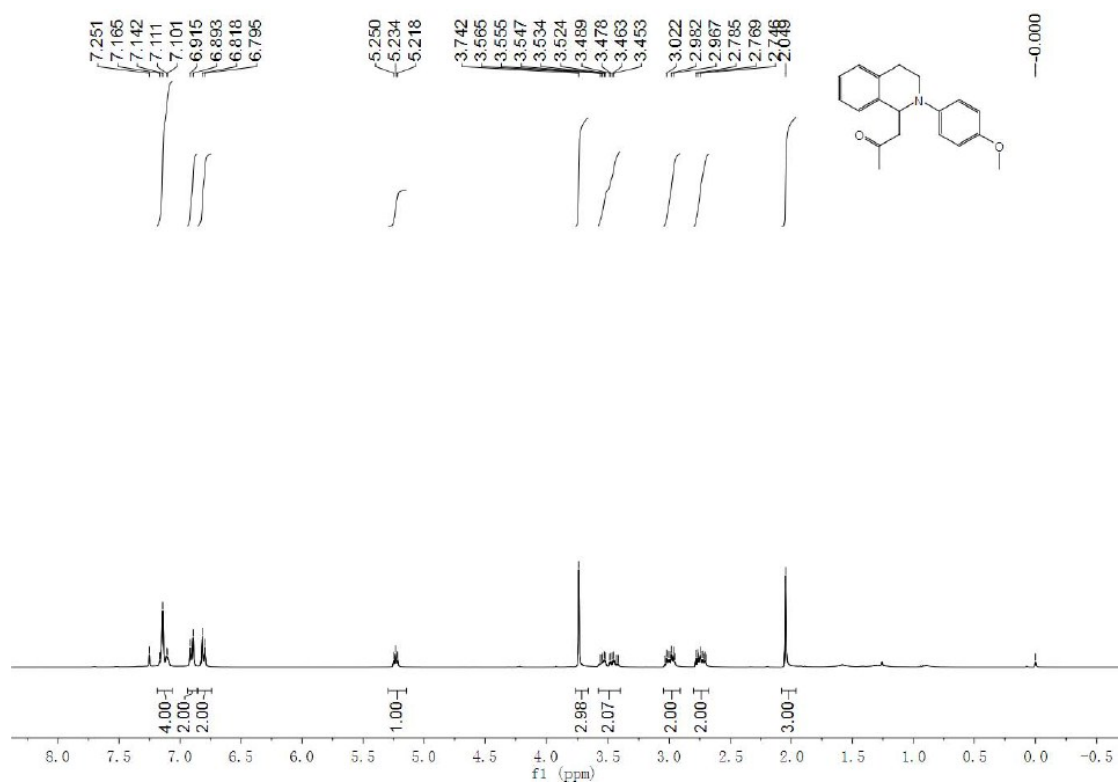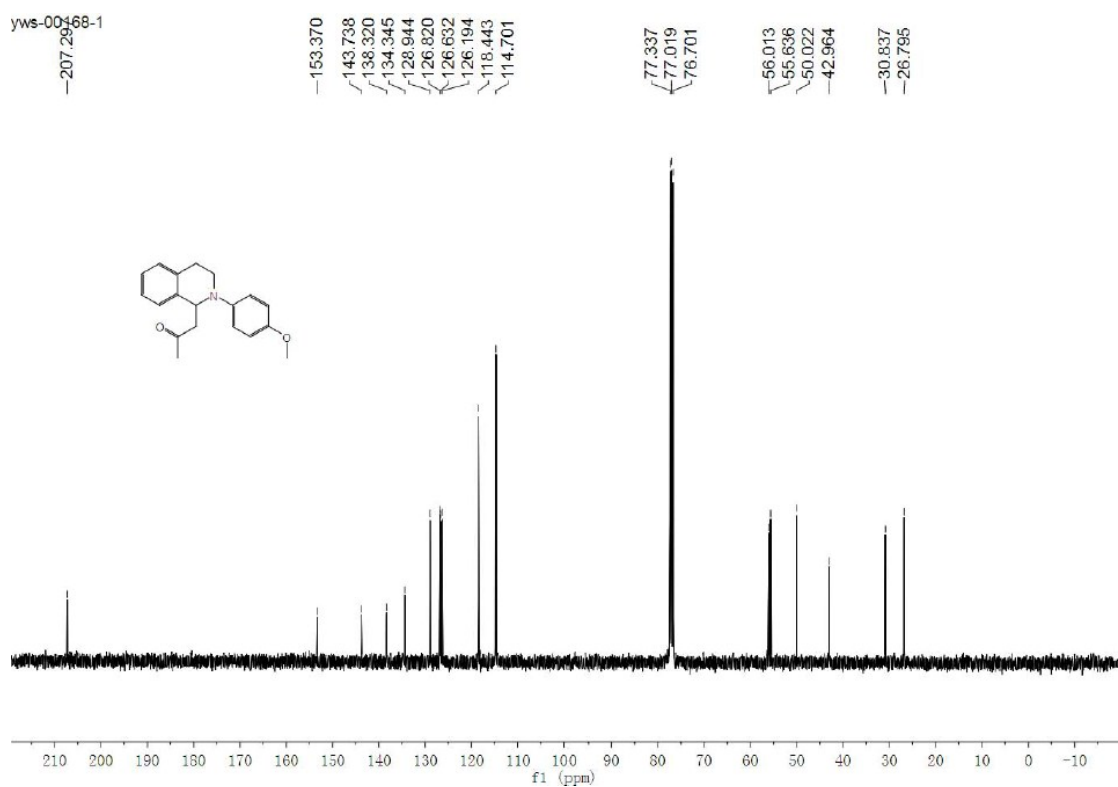

<sup>1</sup>H NMR and <sup>13</sup>C NMR spectra of compound **3u**

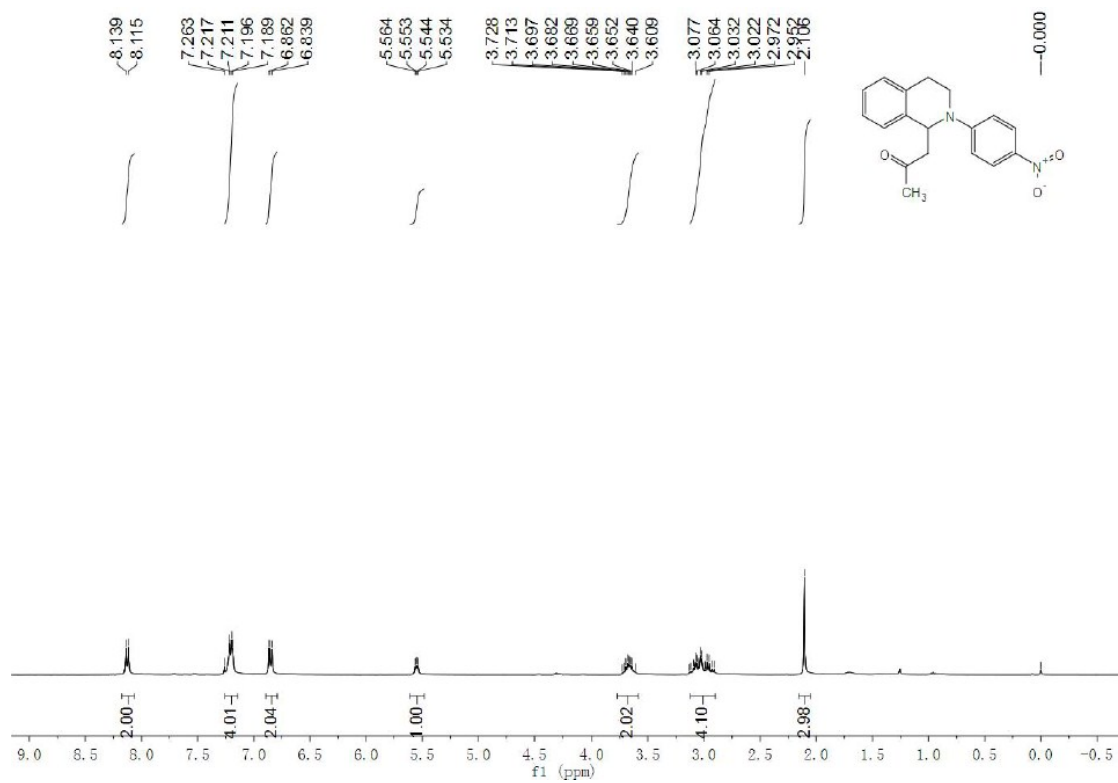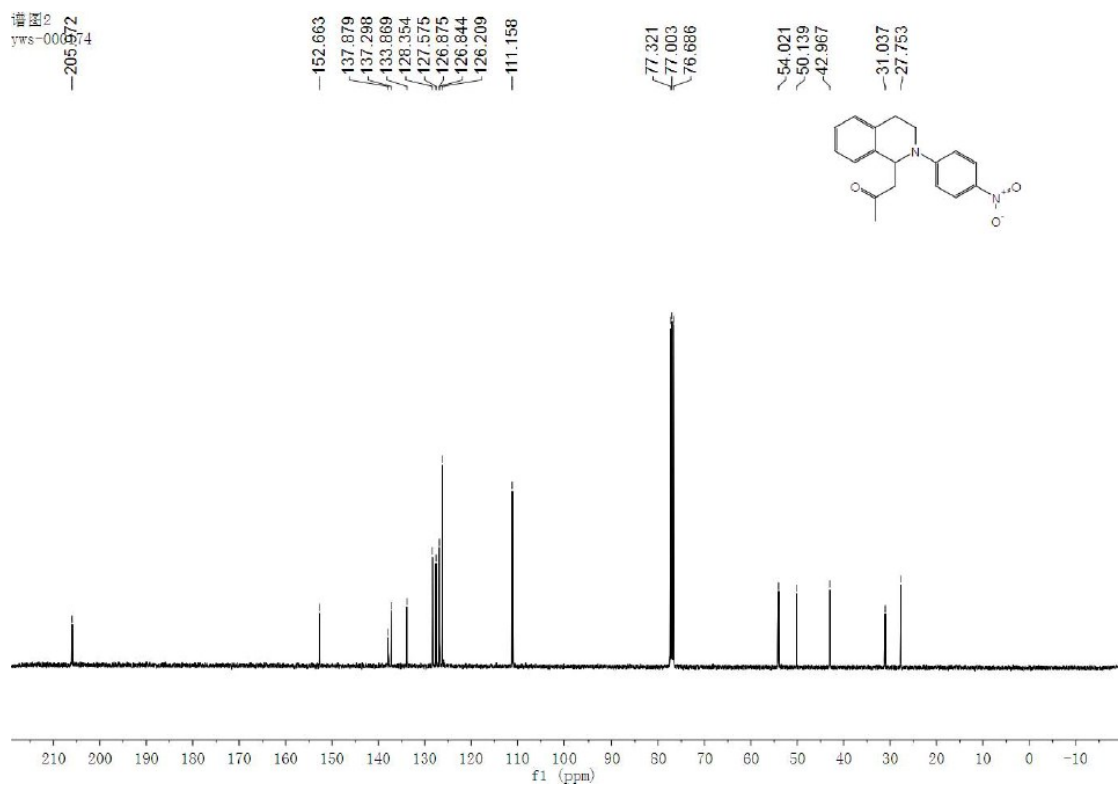

<sup>1</sup>H NMR and <sup>13</sup>C NMR spectra of compound **3v**

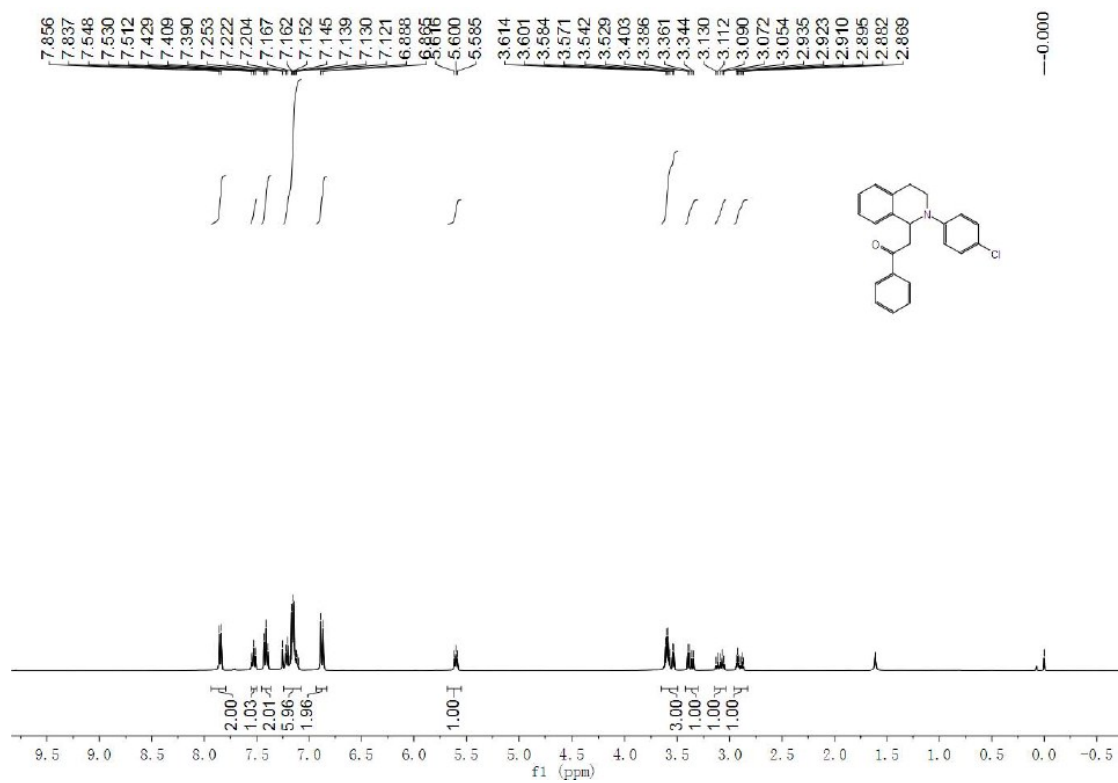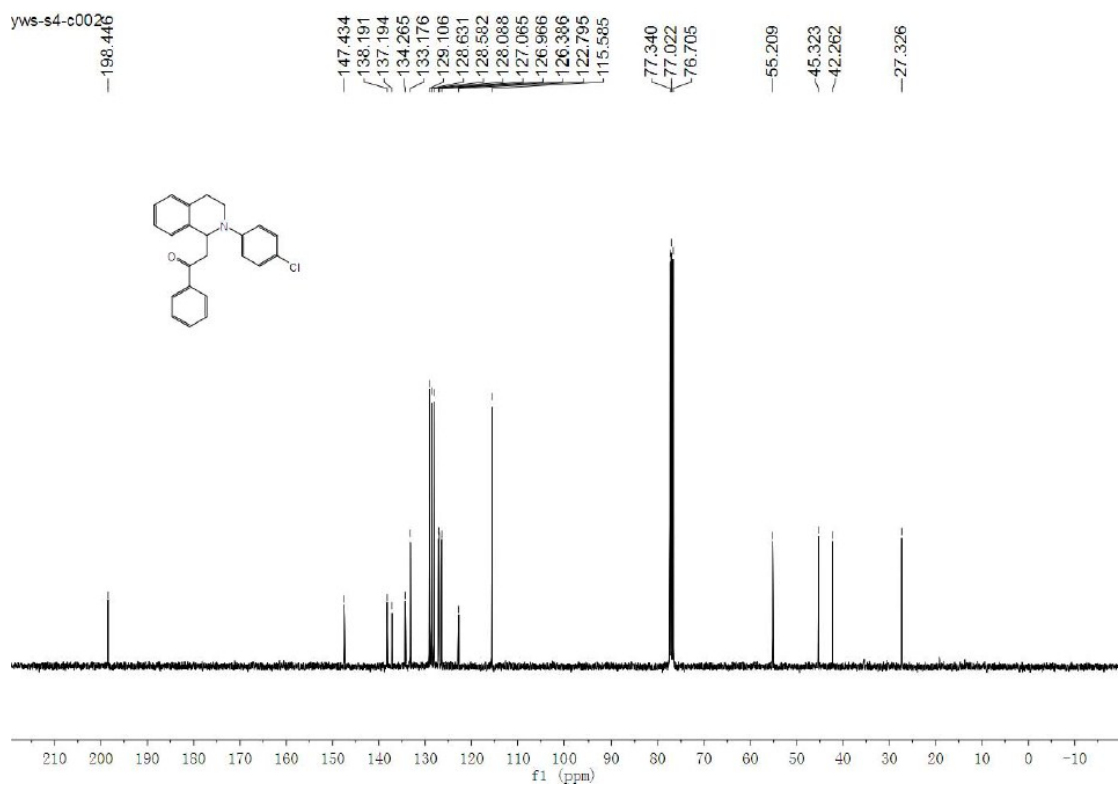

<sup>1</sup>H NMR and <sup>13</sup>C NMR spectra of compound **3w**



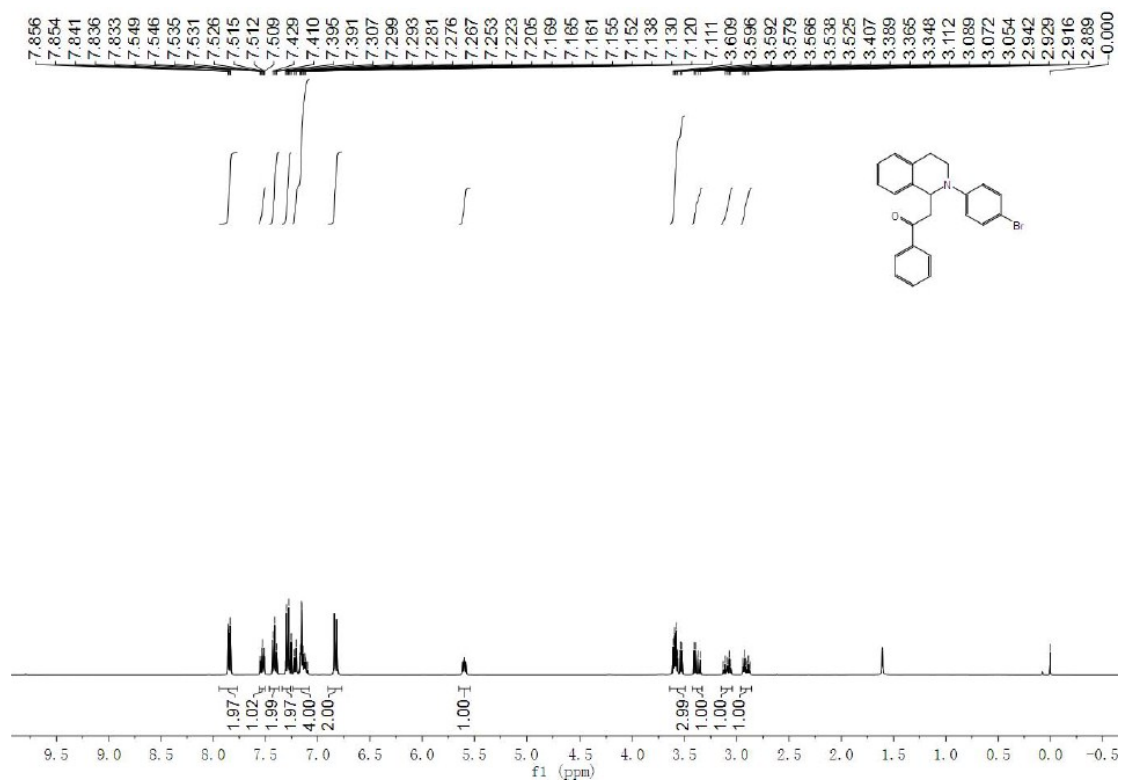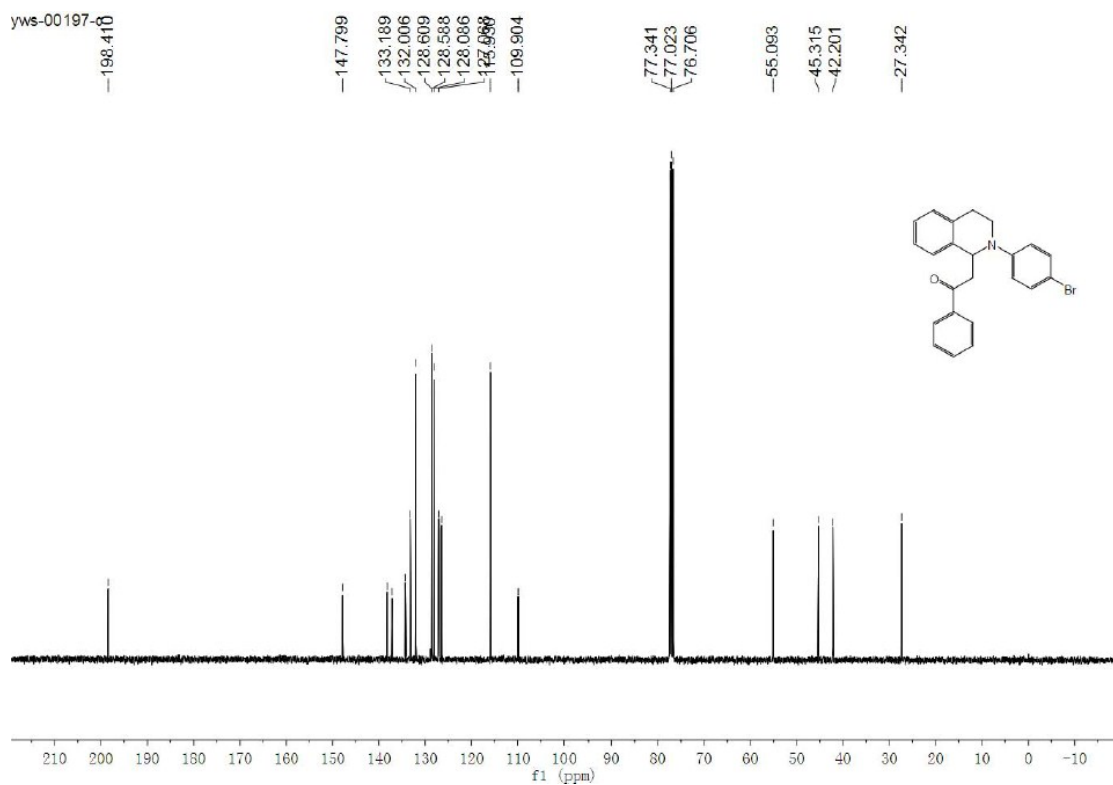

$^1\text{H}$  NMR and  $^{13}\text{C}$  NMR spectra of compound 3x

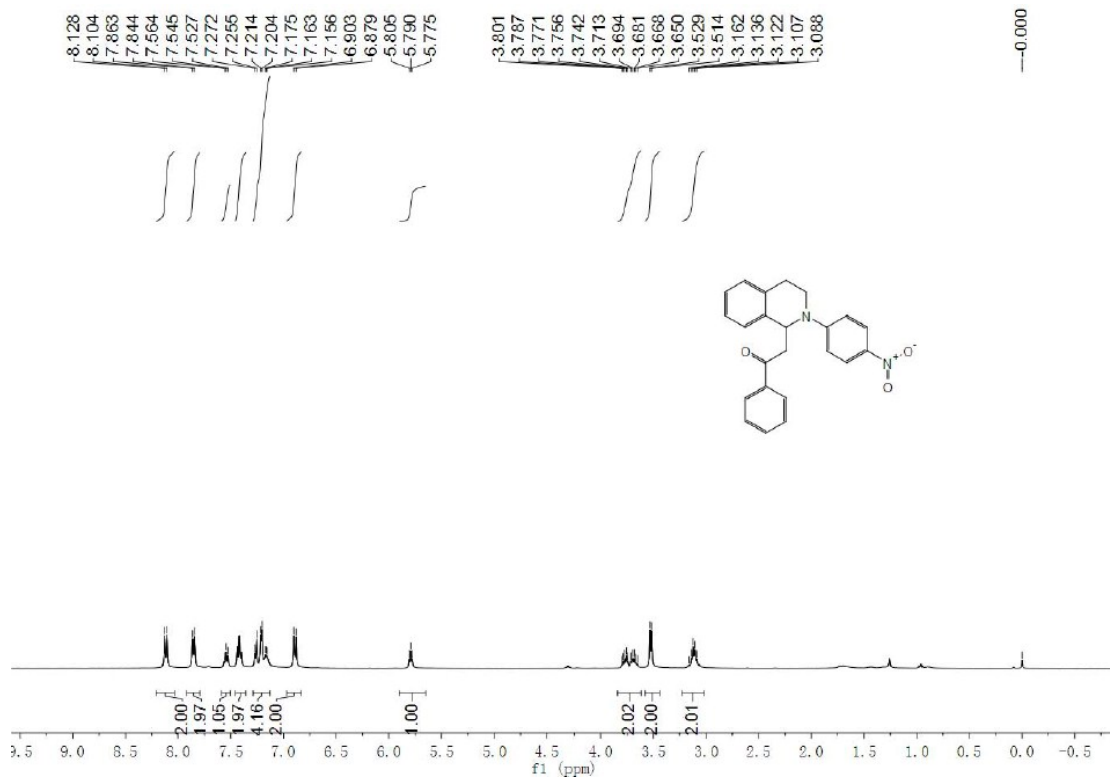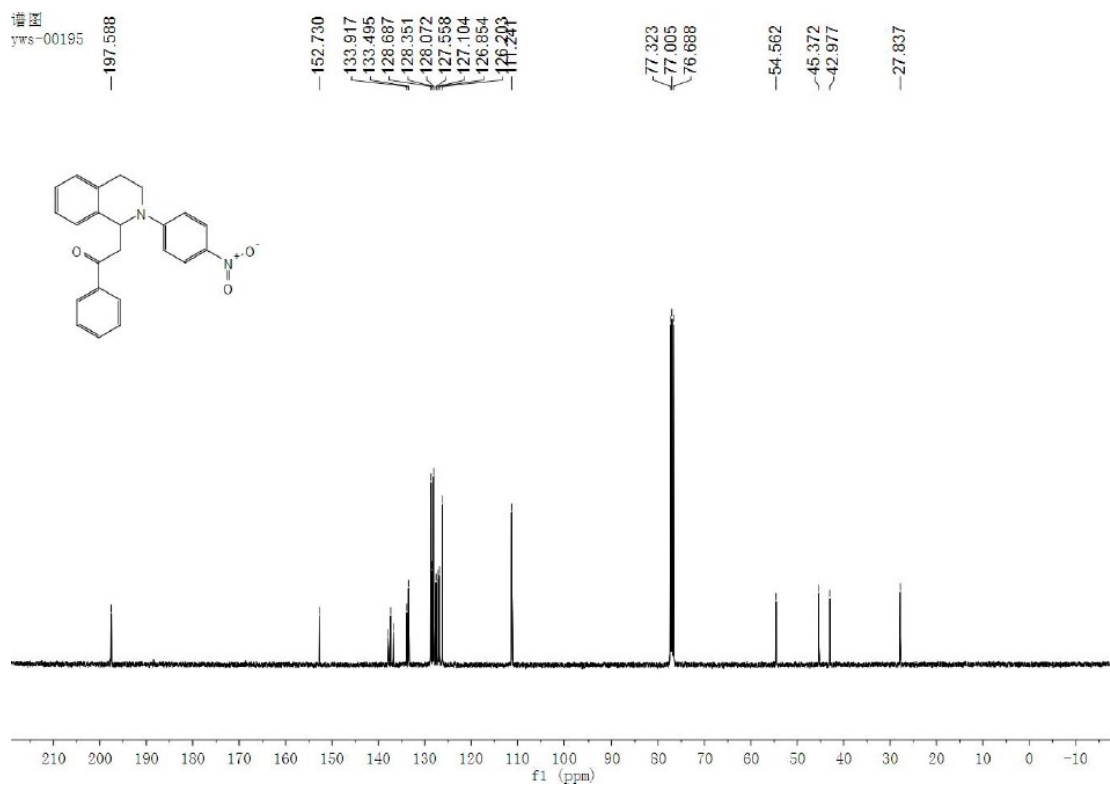

<sup>1</sup>H NMR and <sup>13</sup>C NMR spectra of compound **3y**

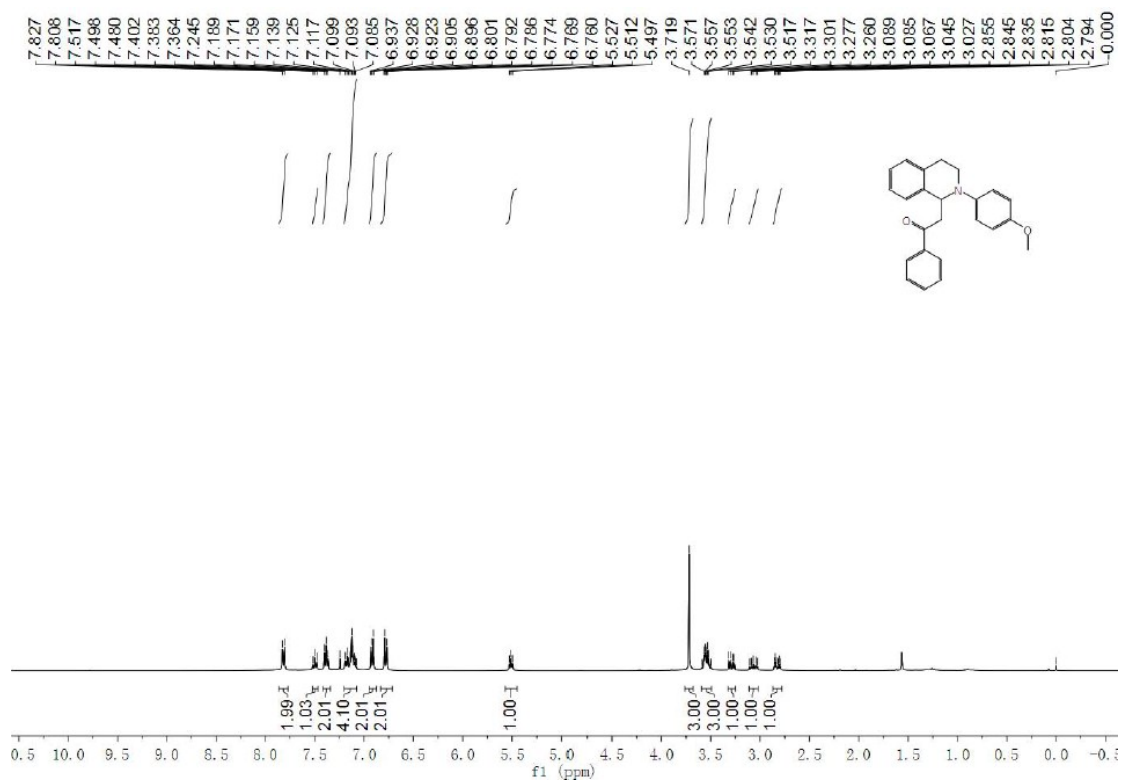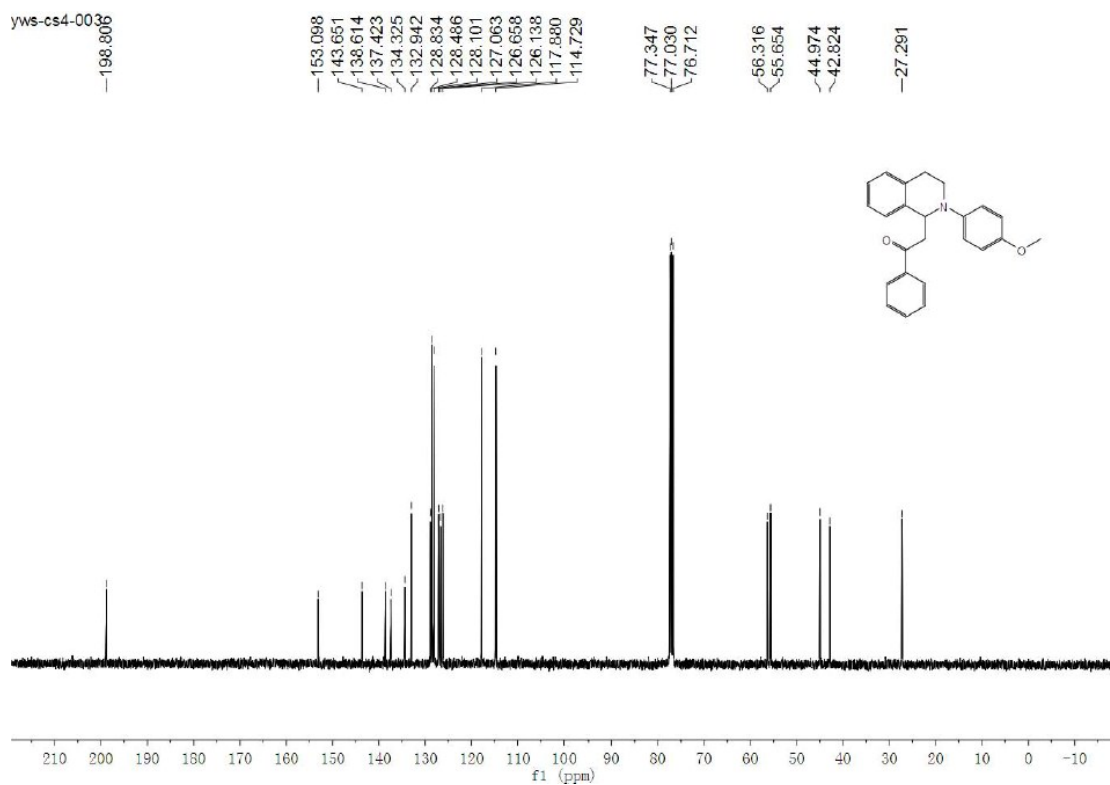

$^1\text{H}$  NMR and  $^{13}\text{C}$  NMR spectra of compound **3z**

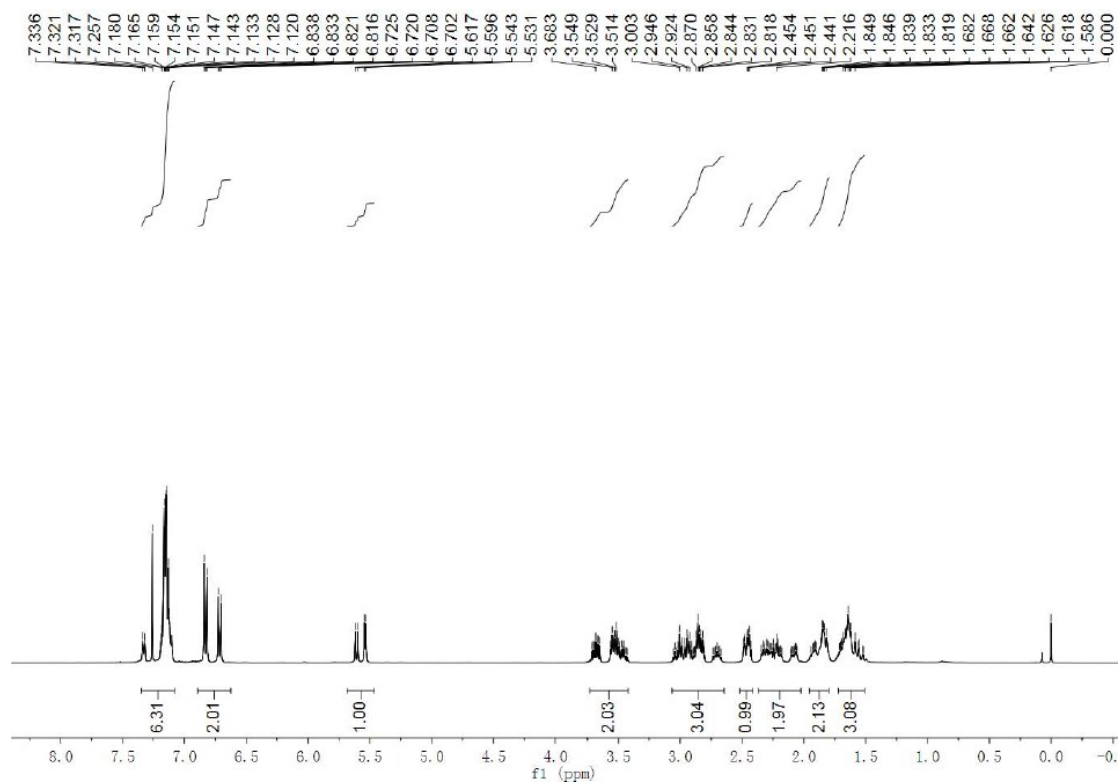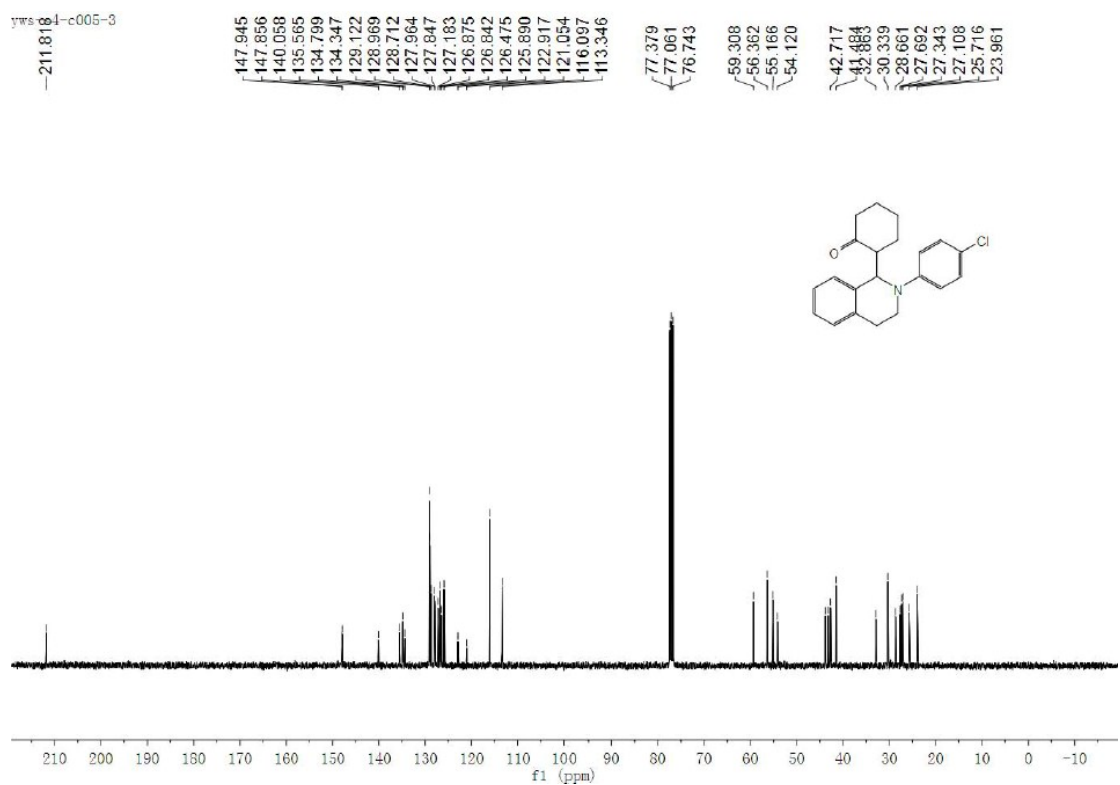

<sup>1</sup>H NMR and <sup>13</sup>C NMR spectra of compound 3a'

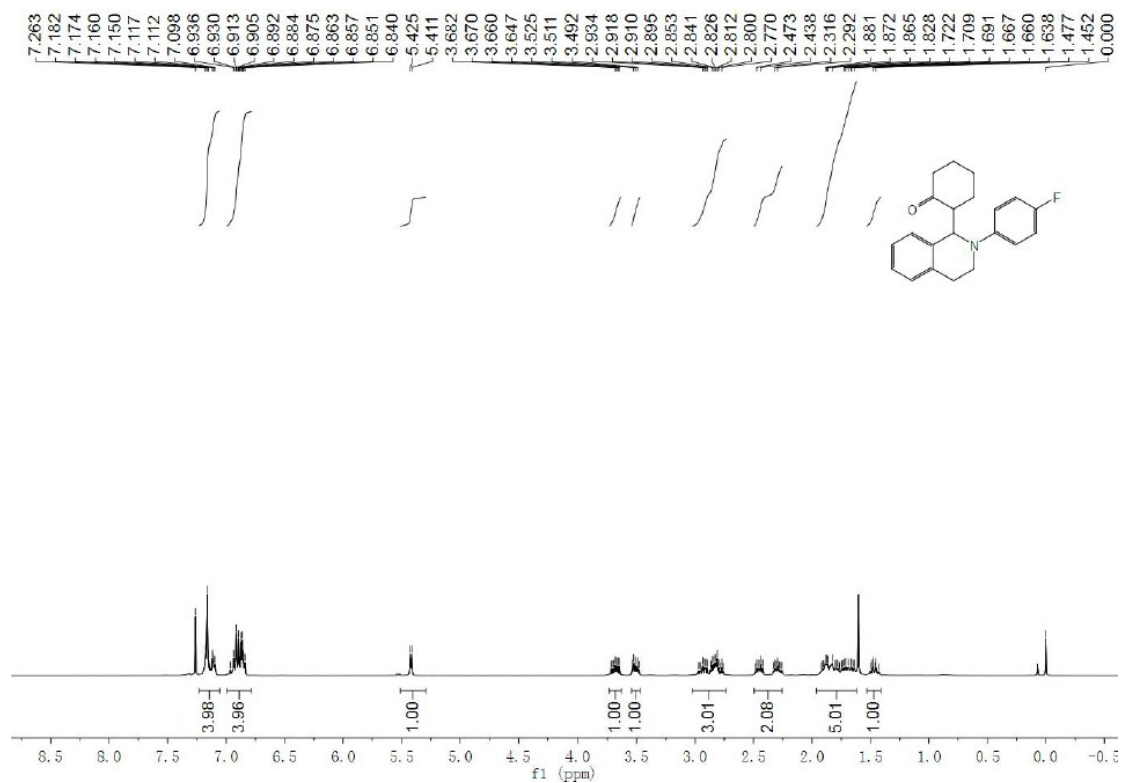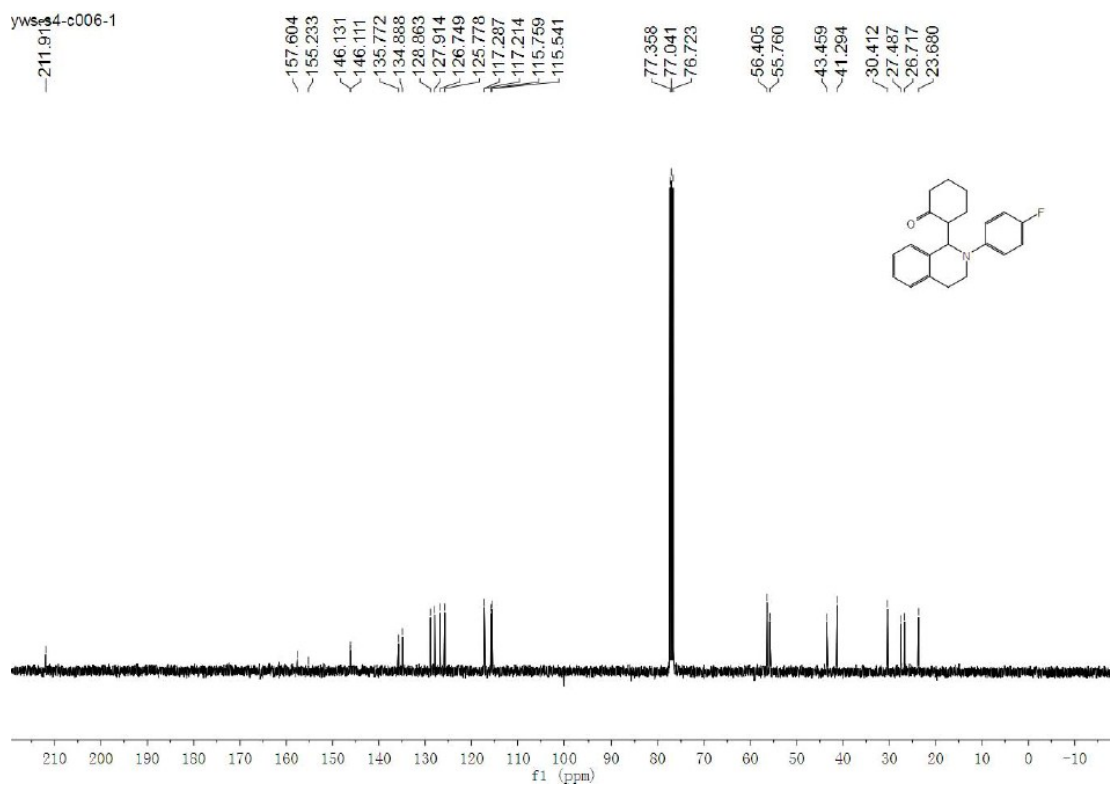

<sup>1</sup>H NMR and <sup>13</sup>C NMR spectra of compound 3b'
